# Supplementary material for: Weakening Correlation and Delaying Response Time of Ecosystem Water Use Efficiency to Drought
Source: Copernicus journal article supplement (doi:10.5194/egusphere-2025-6195), 2026-01-14
Supplement: Supplementary file 1 [file egusphere-2025-6195-supplement.pdf]

1 **Supplementary for the manuscript “Weakening Correlation and**  
2 **Delaying Response Time of Ecosystem Water Use Efficiency to**  
3 **Drought”**

4 **Zijun Wang<sup>a</sup>, Rong Wu<sup>b</sup>, Yangyang Liu<sup>c,\*</sup>, Zhaoying Zhang<sup>d</sup>,**  
5 **Zhongming Wen<sup>c</sup>, Zhenqian Wang<sup>e</sup>, Stephen Sitch<sup>f</sup>, Wenping Yuan<sup>g</sup>**

6 <sup>a</sup> *College of Water Resources and Architectural Engineering, Northwest A&F*  
7 *University, Yangling, Shaanxi 712100, China*

8 <sup>b</sup> *Shenzhen Key Laboratory of Precision Measurement and Early Warning Technology*  
9 *for Urban Environmental Health Risks, School of Environmental Science and*  
10 *Engineering, Southern University of Science and Technology, Shenzhen 518055, China*

11 <sup>c</sup> *College of Grassland Agriculture, Northwest A&F University, Yangling, Shaanxi*  
12 *712100, China*

13 <sup>d</sup> *Jiangsu Center for Collaborative Innovation in Geographical Information Resource*  
14 *Development and Application, International Institute for Earth System Sciences,*  
15 *Nanjing University, Nanjing, Jiangsu 210023, China*

16 <sup>e</sup> *Department of Physical Geography and Bolin Centre for Climate Research,*  
17 *Stockholm University, Stockholm 10691, Sweden*

18 <sup>f</sup> *Faculty of Environment, Science and Economy, University of Exeter, Exeter, UK*

19 <sup>g</sup> *Institute of Carbon Neutrality, Sino -French Institute for Earth System Science,*  
20 *College of Urban and Environmental Sciences, Peking University, Beijing, China*  
21

---

\* *Corresponding Author: Yangyang Liu ([lyywylnwafu@163.com](mailto:lyywylnwafu@163.com)).*

*Post address: College of Grassland Agriculture, Northwest A&F University, Xinong  
Road 22, Yangling 712100, China.*

22 **The supplementary includes the following contents:**

- 23 1. Figure S1. Global distribution of the 85 selected FLUXNET 2015 sites.
- 24 2. Figure S2. Site-scale validation of WUE derived from multi-source remote sensing  
25 data against WUE calculated from the 85 FLUXNET 2015 sites.
- 26 3. Figure S3. Spatial distribution of vegetation types.
- 27 4. Figure S4. Spatial distribution of the drought gradient.
- 28 5. Figure S5. Temporal trends in the  $R_{max}$  and  $T_{opt}$  between global WUE and SPEI  
29 under (a) a 16-year and (b) a 20-year moving window.
- 30 6. Figure S6. Performance validation of remotely sensed WUE against seven  
31 TRENDY models and the multi-model ensemble mean.
- 32 7. Figure S7. Temporal trends in the  $R_{max}$  between WUE and SPEI derived from  
33 various TRENDY models under 16-year, 18-year, and 20-year moving windows.
- 34 8. Figure S8. Temporal trends in the  $T_{opt}$  between WUE and SPEI derived from  
35 various TRENDY models under 16-year, 18-year, and 20-year moving windows.
- 36 9. Figure S9. Spatiotemporal variations in (1)  $R_{max}$  and (2)  $T_{opt}$  between WUE and  
37 SPEI (1) derived from various TRENDY models under a 16-year moving window.
- 38 10. Figure S10. Spatiotemporal variations in (1)  $R_{max}$  and (2)  $T_{opt}$  between WUE and  
39 SPEI (1) derived from various TRENDY models under a 18-year moving window.
- 40 11. Figure S11. Spatiotemporal variations in (1)  $R_{max}$  and (2)  $T_{opt}$  between WUE and  
41 SPEI (1) derived from various TRENDY models under a 20-year moving window.
- 42 12. Figure S12. Variable contributions of CO<sub>2</sub>, CLI, and LCC to  $R_{max}$  and  $T_{opt}$  under  
43 a 16-year moving window. (The left and right columns represent contributions to  
44 correlation coefficients and lag times, respectively, while the rows from top to bottom  
45 indicate the contributions of CO<sub>2</sub>, CLI, and LCC.)

46 13. Figure S13. Variable contributions of CO<sub>2</sub>, CLI, and LCC to  $R_{max}$  and  $T_{opt}$  under  
47 a 20-year moving window. (The left and right columns represent contributions to  
48 correlation coefficients and lag times, respectively, while the rows from top to bottom  
49 indicate the contributions of CO<sub>2</sub>, CLI, and LCC.)

50 14. Figure S14. Variable contributions separated by TRENDY under a 16-year moving  
51 window.

52 15. Figure S15. Variable contributions separated by TRENDY under a 20-year moving  
53 window.

54 16. Figure S16. Spatial distribution of the dominant factors influencing  $R_{max}$  for CO<sub>2</sub>,  
55 LCC, and CLI under (a) a 16-year and (b) a 20-year moving window.

56 17. Figure S17. Spatial distribution of the dominant factors influencing  $T_{opt}$  for CO<sub>2</sub>,  
57 LCC, and CLI under (a) a 16-year and (b) a 20-year moving window.

58 18. Figure S18. Spatial distribution of (1) mean and (2) change rates for (a) Pre, (b)  
59 Rad, (c) SMroot, (d) SMSurf, (e) Temp, (f) VPD, and (g) WS.

60 19. Figure S19. Model validation of (a)  $R_{max}$  and (b)  $T_{opt}$  based on XGBoost  
61 predictions.

62 20. Figure S20. Global and local SHAP analyses of the effects of hydrothermal factors  
63 on (a)  $R_{max}$  and (b)  $T_{opt}$  in shrub.

64 21. Figure S21. Global and local SHAP analyses of the effects of hydrothermal factors  
65 on (a)  $R_{max}$  and (b)  $T_{opt}$  in Forest.

66 22. Figure S22. Global and local SHAP analyses of the effects of hydrothermal factors  
67 on (a)  $R_{max}$  and (b)  $T_{opt}$  in Pasture.

68 23. Figure S23. Global and local SHAP analyses of the effects of hydrothermal factors  
69 on (a)  $R_{max}$  and (b)  $T_{opt}$  in Cropland.

70 24. Figure S24. Global and local SHAP analyses of the effects of hydrothermal factors  
71 on (a)  $R_{max}$  and (b)  $T_{opt}$  in AR.

72 25. Figure S25. Global and local SHAP analyses of the effects of hydrothermal factors  
73 on (a)  $R_{max}$  and (b)  $T_{opt}$  in SAR.

74 26. Figure S26. Global and local SHAP analyses of the effects of hydrothermal factors  
75 on (a)  $R_{max}$  and (b)  $T_{opt}$  in SH.

76 27. Figure S27. Global and local SHAP analyses of the effects of hydrothermal factors  
77 on (a)  $R_{max}$  and (b)  $T_{opt}$  in SHR.

78 28. Figure S28. Causal network diagram of hydrothermal factors,  $R_{max}$ , and  $T_{opt}$  across  
79 different vegetation types under AR.

80 29. Figure S29. Causal network diagram of hydrothermal factors,  $R_{max}$ , and  $T_{opt}$  across  
81 different vegetation types under SAR.

82 30. Figure S30. Causal network diagram of hydrothermal factors,  $R_{max}$ , and  $T_{opt}$  across  
83 different vegetation types under SH.

84 31. Figure S31. Causal network diagram of hydrothermal factors,  $R_{max}$ , and  $T_{opt}$  across  
85 different vegetation types under HR.

86 32. Table S1. Basic information of the 85 selected FLUXNET 2015 sites.

87

88 **Supplementary Materials**

89 **Supplementary Figures**

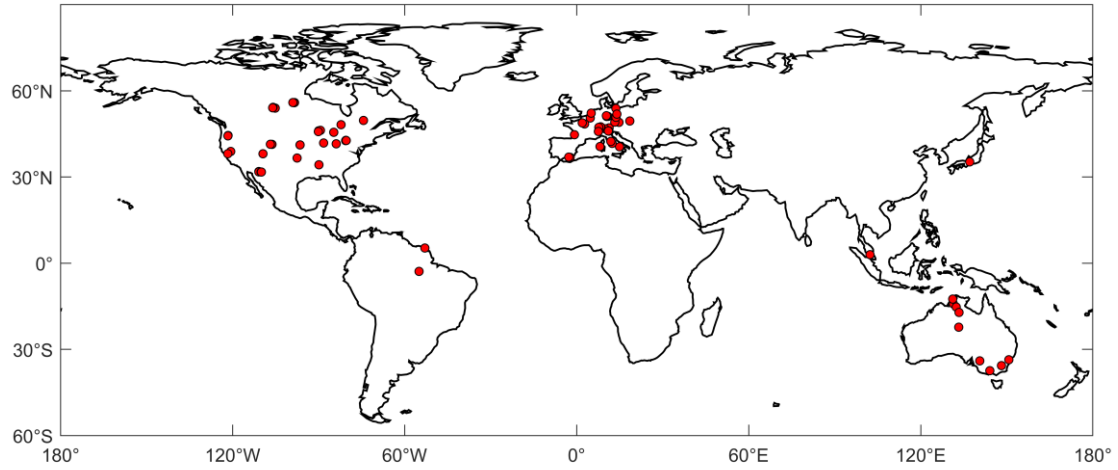

90

91 Figure S1. Global distribution of the 85 selected FLUXNET 2015 sites.

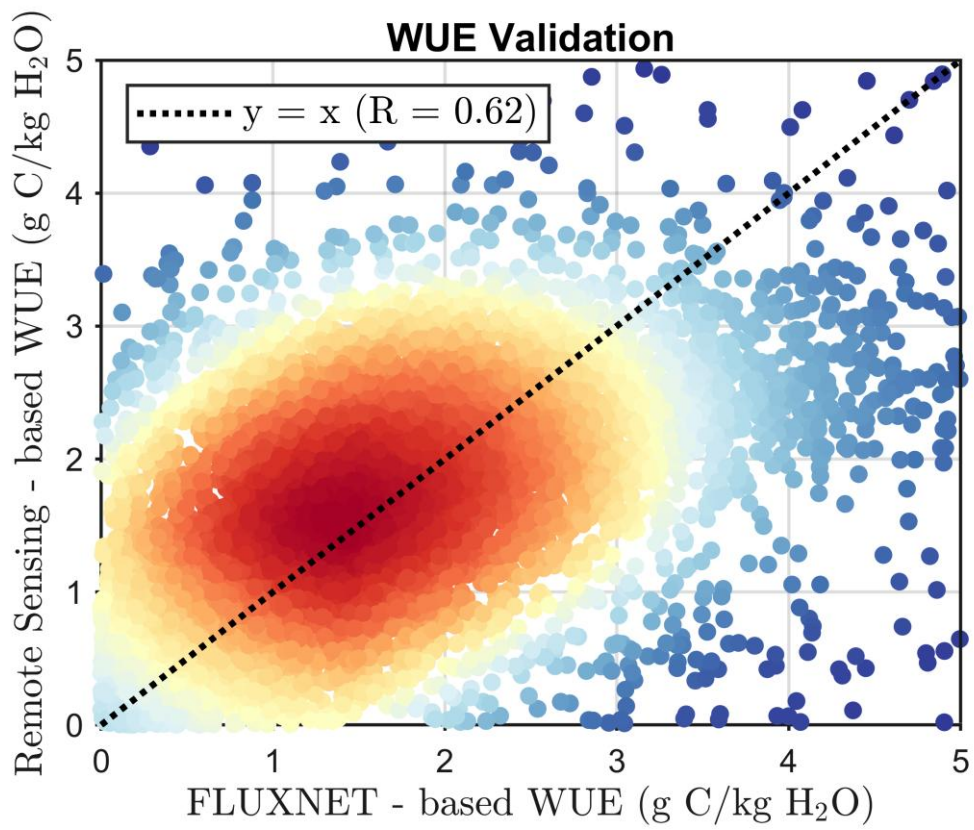

92

93 Figure S2. Site-scale validation of WUE derived from multi-source remote sensing  
94 data against WUE calculated from the 85 FLUXNET 2015 sites.

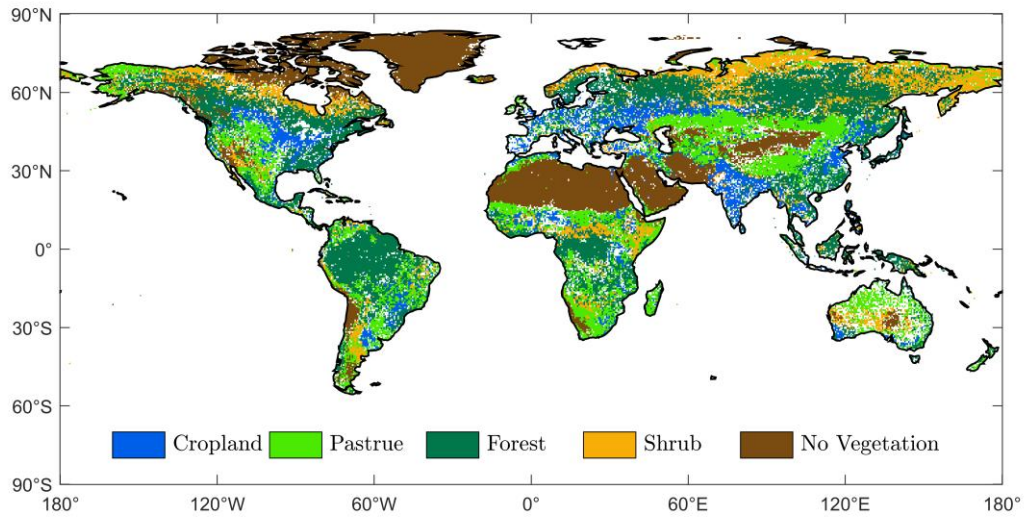

95

96 Figure S3. Spatial distribution of vegetation types.

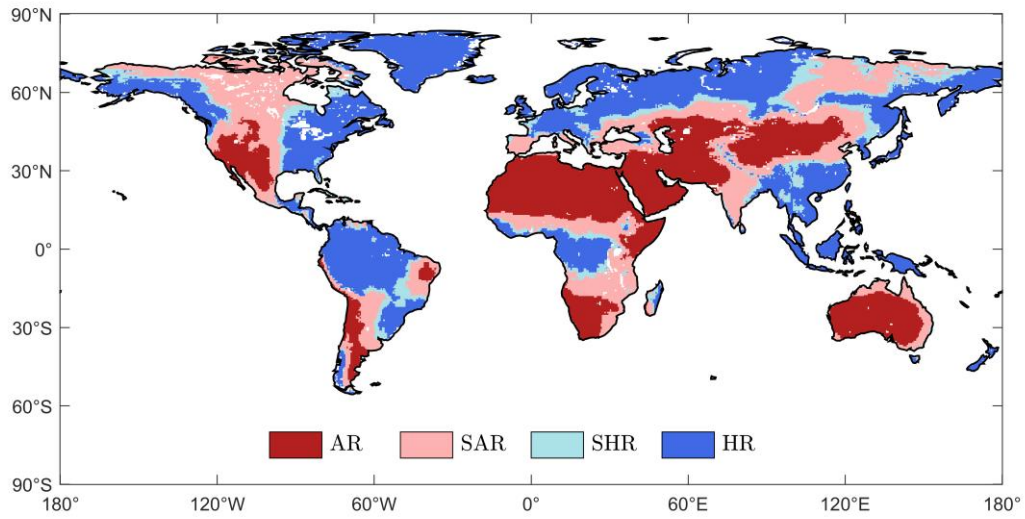

97

98 Figure S4. Spatial distribution of the drought gradient.



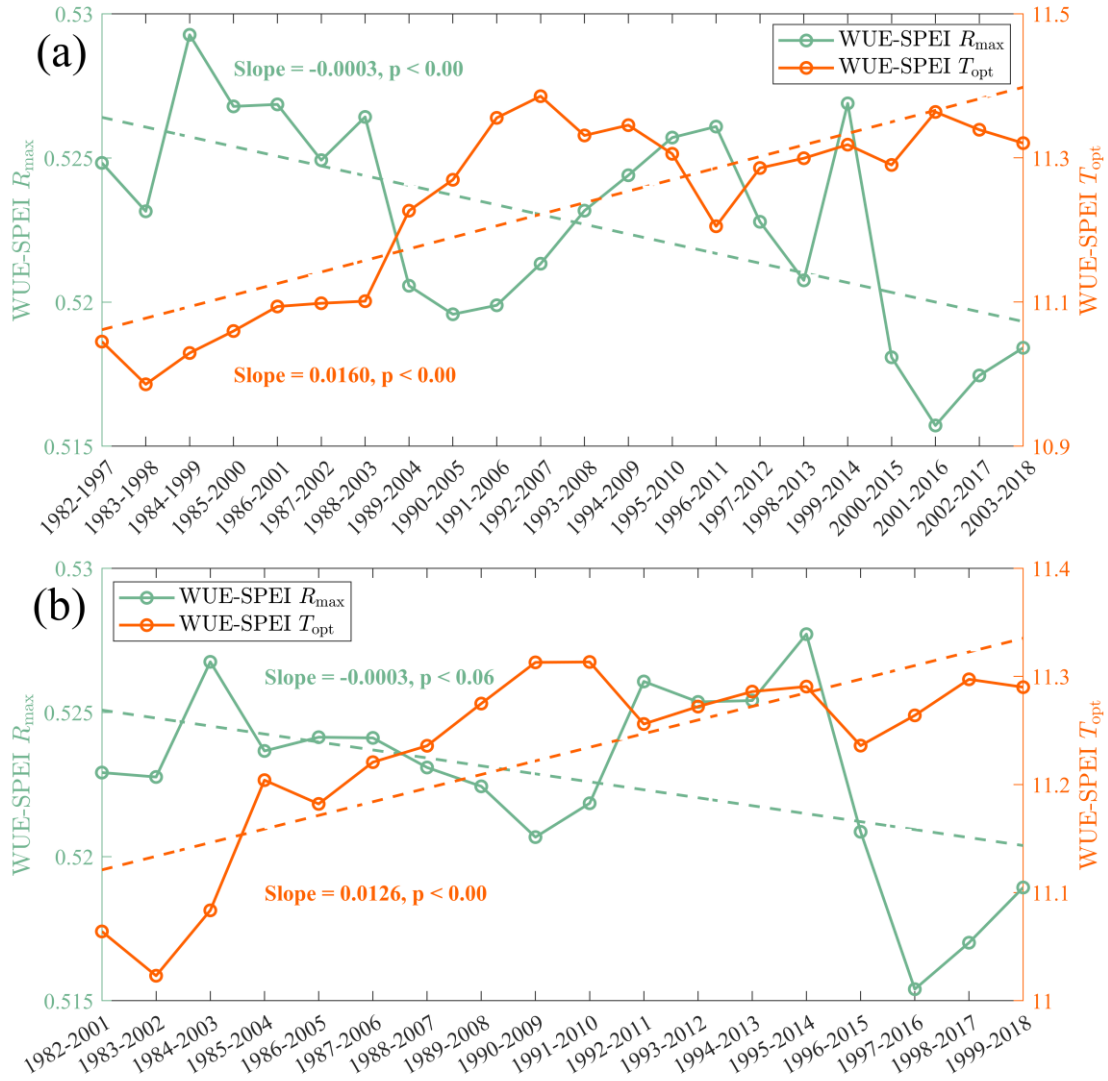

99

100 Figure S5. Temporal trends in the  $R_{max}$  and  $T_{opt}$  between global WUE and SPEI

101 under (a) a 16-year and (b) a 20-year moving window.

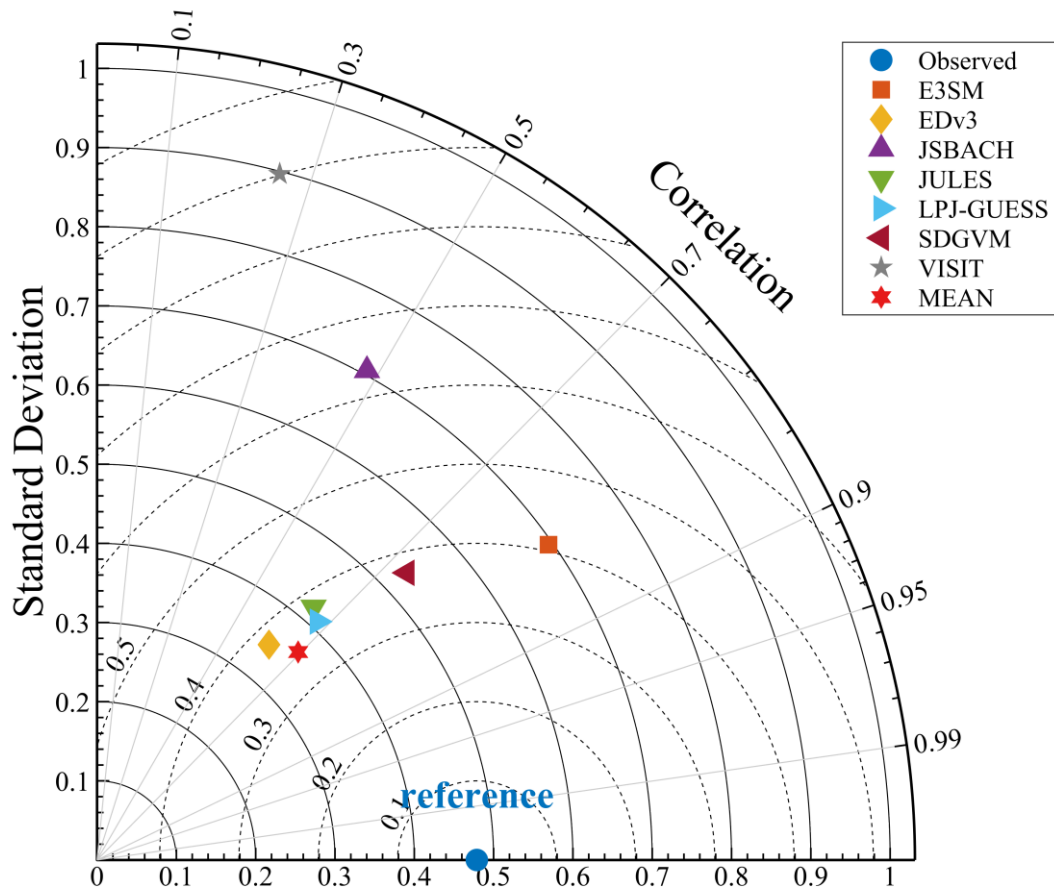

102

103 Figure S6. Performance validation of remotely sensed WUE against seven TRENDY

104 models and the multi-model ensemble mean.

105

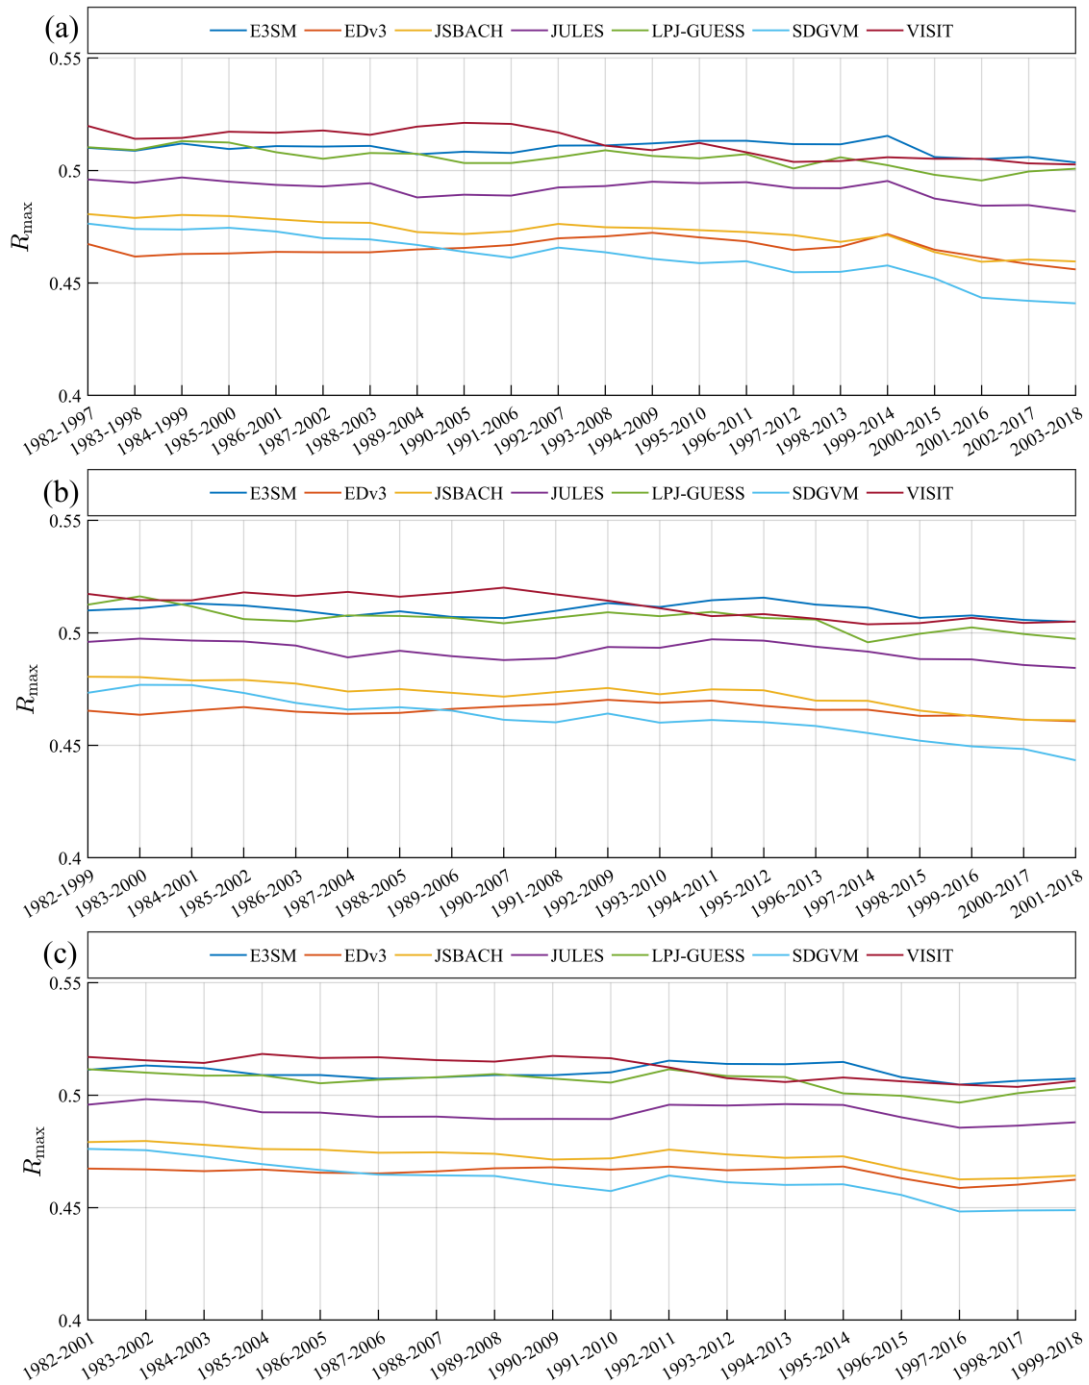

106

107 Figure S7. Temporal trends in the  $R_{max}$  between WUE and SPEI derived from various

108 TRENDY models under 16-year, 18-year, and 20-year moving windows.

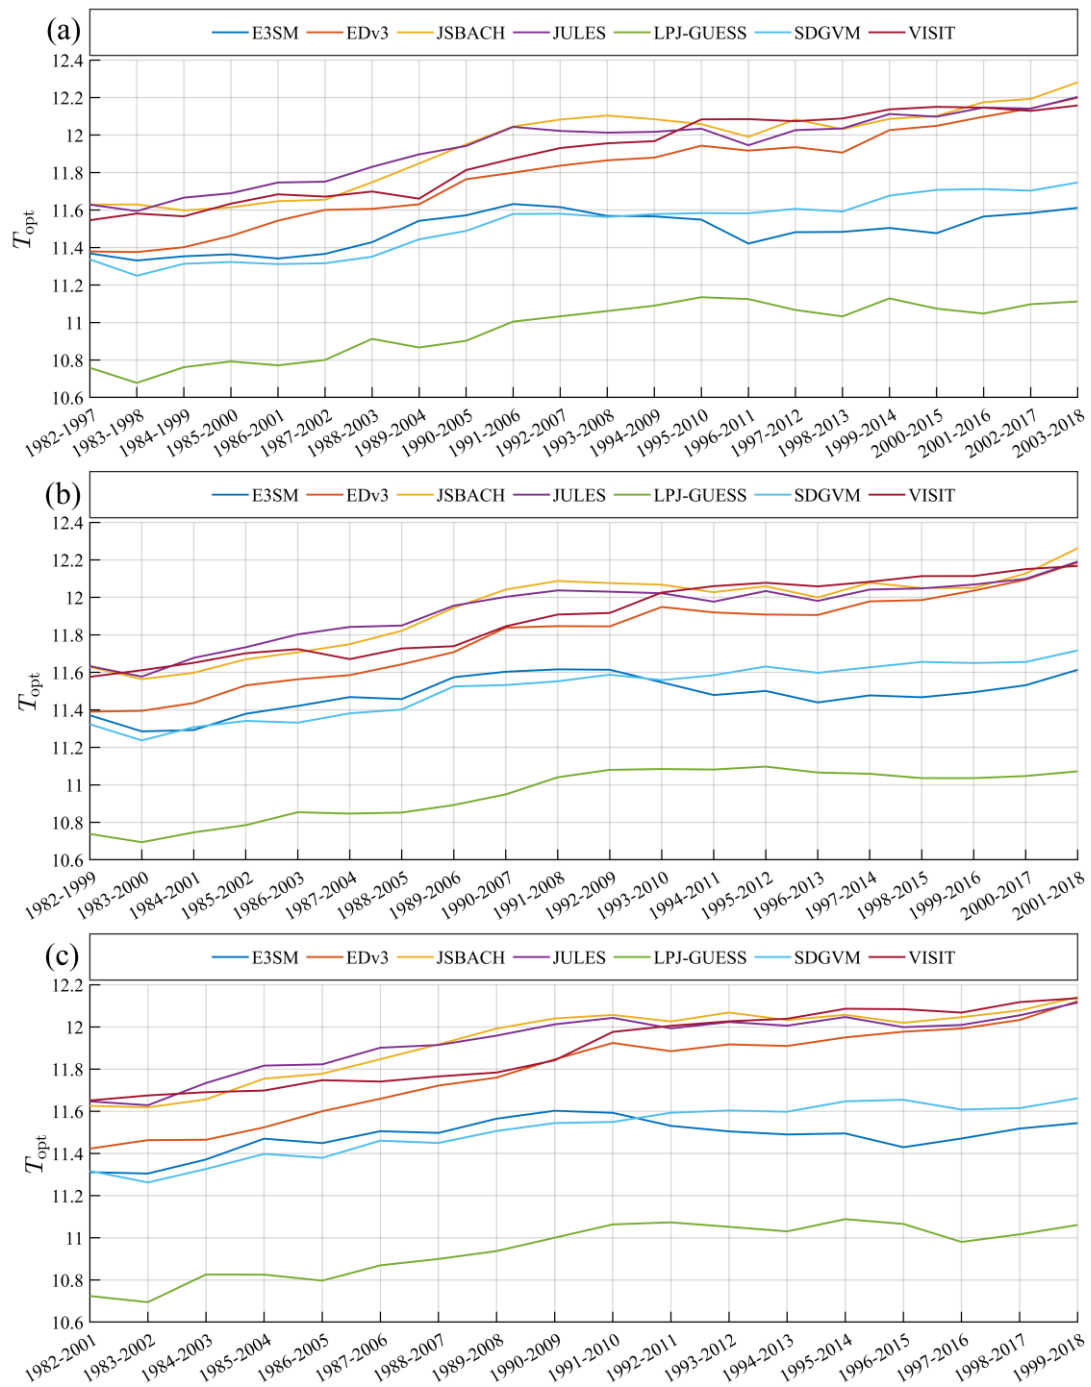

109

110 Figure S8. Temporal trends in the  $T_{opt}$  between WUE and SPEI derived from various

111 TRENDY models under 16-year, 18-year, and 20-year moving windows.

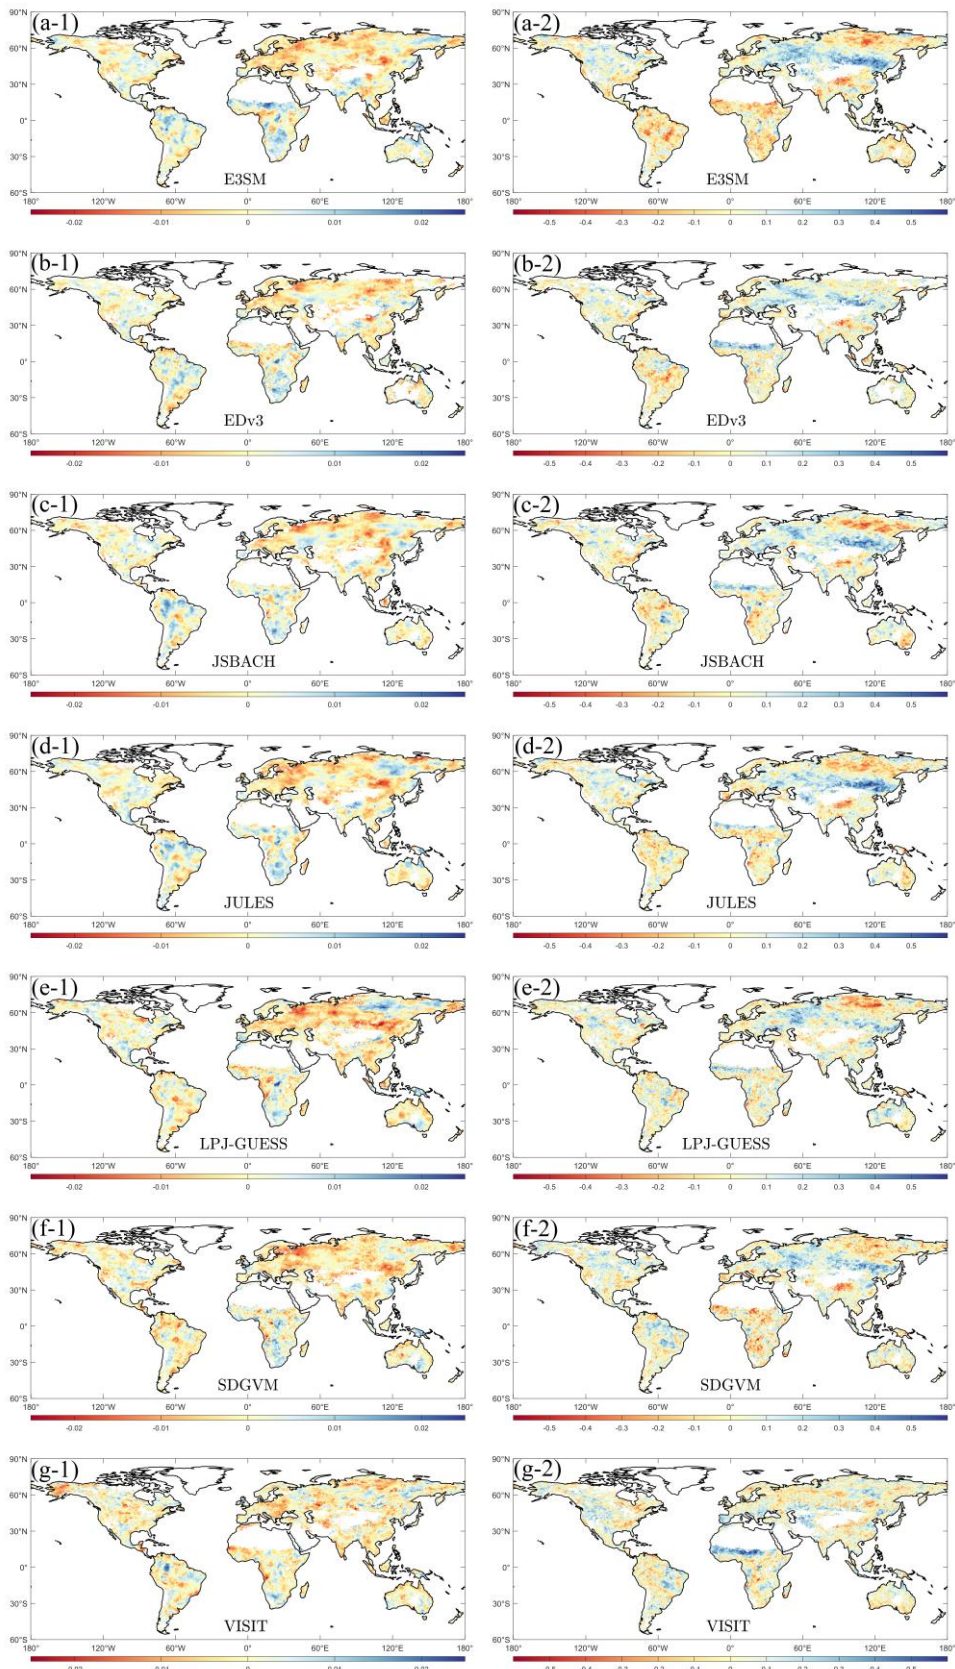

112

113 Figure S9. Spatiotemporal variations in (1)  $R_{max}$  and (2)  $T_{opt}$  between WUE and

114 SPEI (1) derived from various TRENDY models under a 16-year moving window.

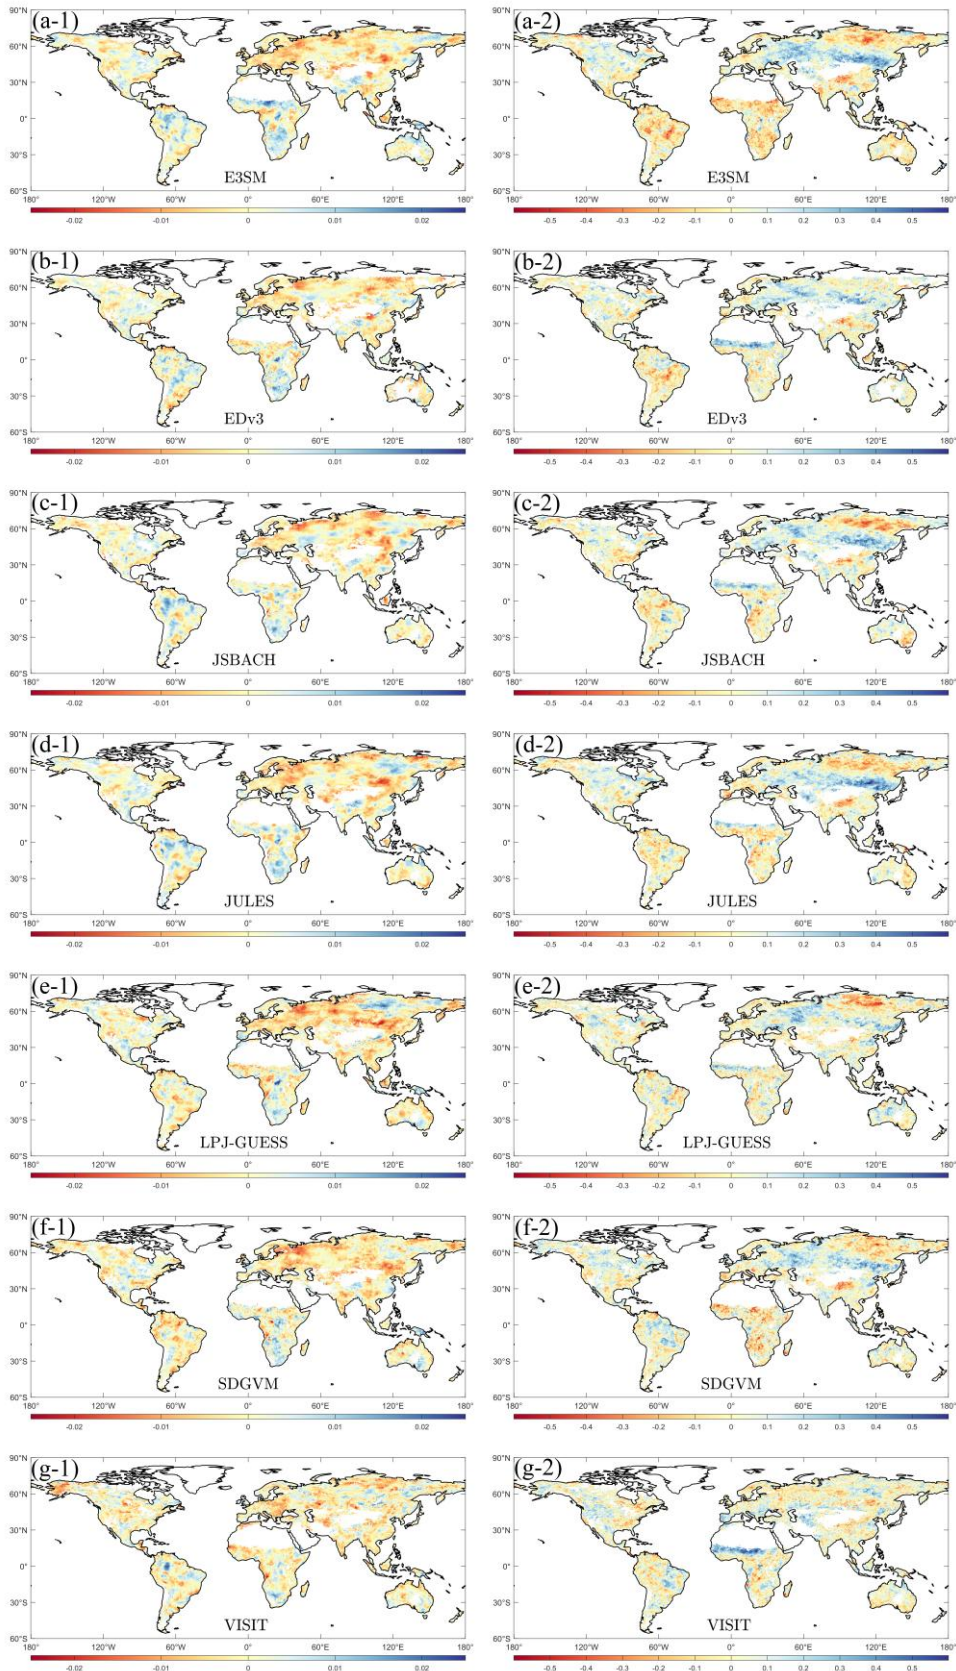

115

116 Figure S10. Spatiotemporal variations in (1)  $R_{max}$  and (2)  $T_{opt}$  between WUE and

117 SPEI (1) derived from various TRENDY models under a 18-year moving window.

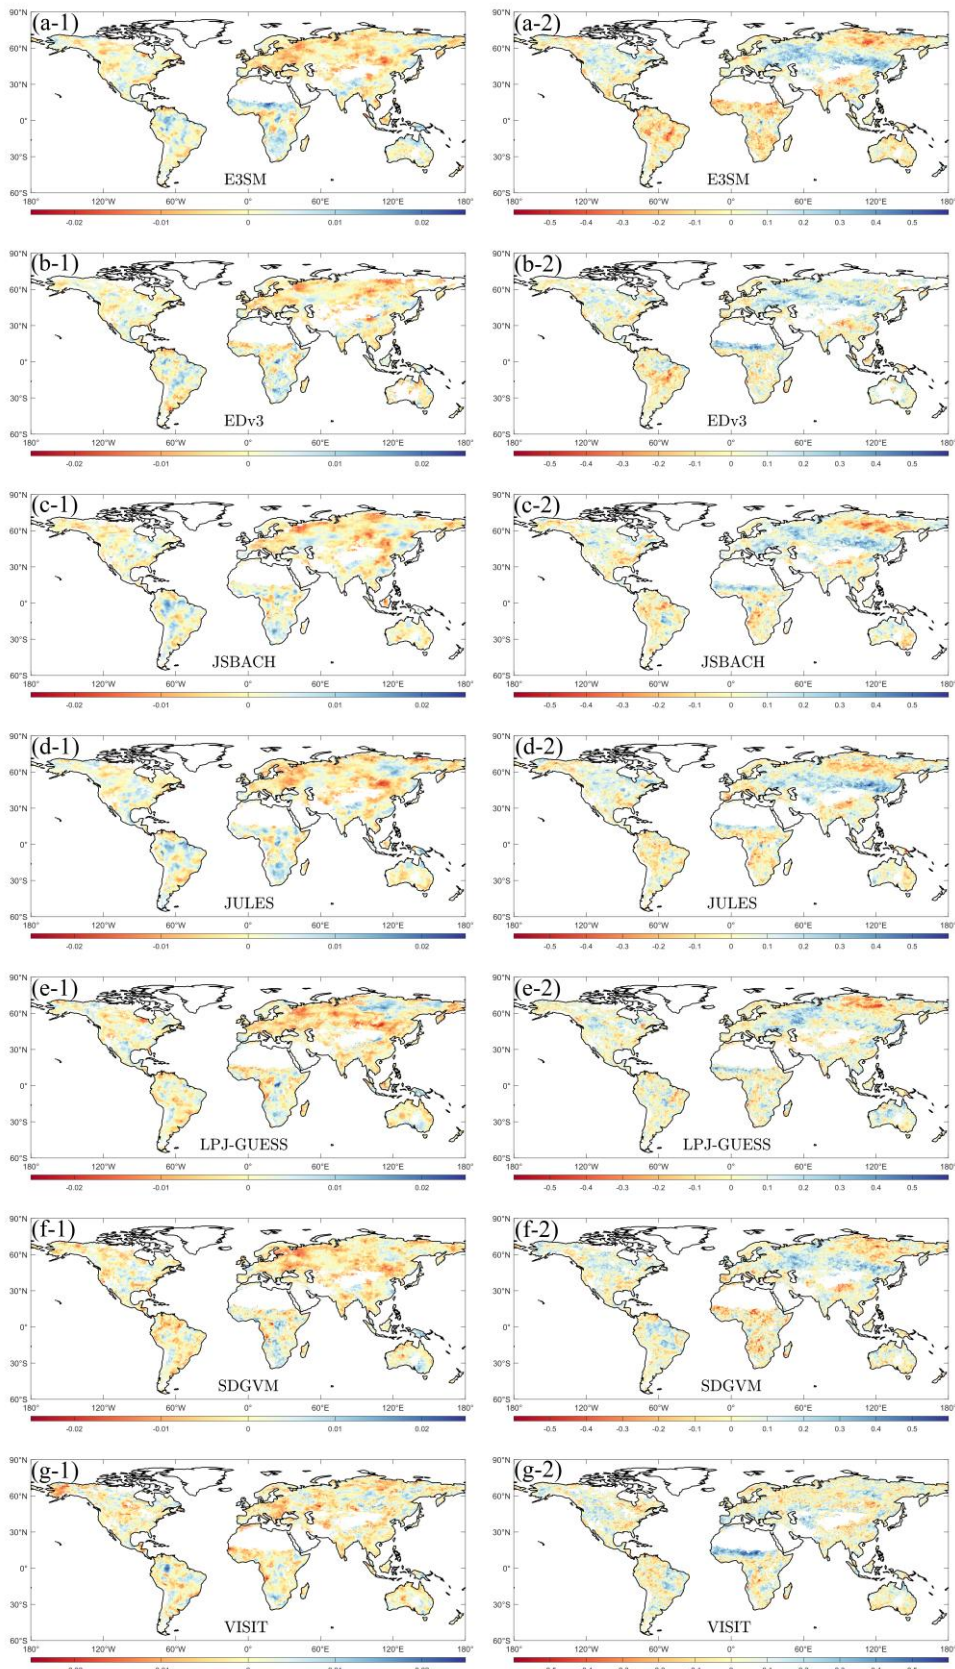

118

119 Figure S11. Spatiotemporal variations in (1)  $R_{max}$  and (2)  $T_{opt}$  between WUE and  
 120 SPEI (1) derived from various TRENDY models under a 20-year moving window.

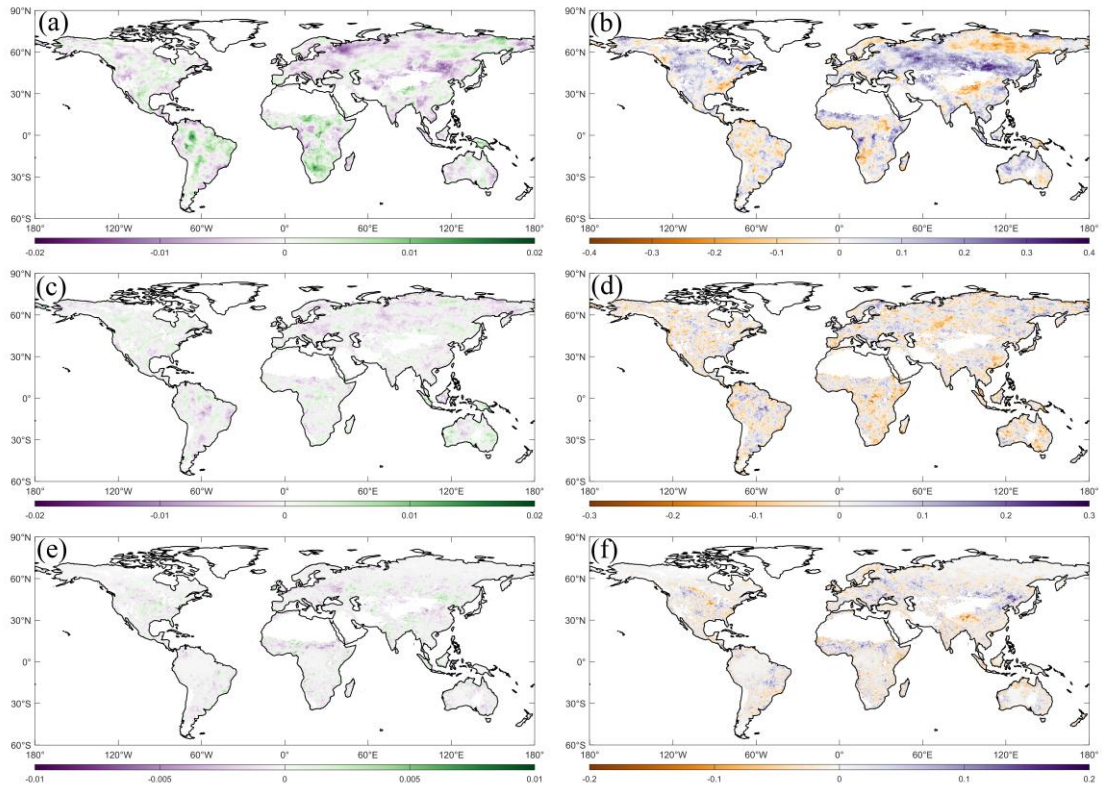

121

122 Figure S12. Variable contributions of CO<sub>2</sub>, CLI, and LCC to  $R_{max}$  and  $T_{opt}$  under a  
 123 16-year moving window. (The left and right columns represent contributions to  
 124 correlation coefficients and lag times, respectively, while the rows from top to bottom  
 125 indicate the contributions of CO<sub>2</sub>, CLI, and LCC.)





126

127 Figure S13. Variable contributions of CO<sub>2</sub>, CLI, and LCC to  $R_{max}$  and  $T_{opt}$  under a  
 128 20-year moving window. (The left and right columns represent contributions to  
 129 correlation coefficients and lag times, respectively, while the rows from top to bottom  
 130 indicate the contributions of CO<sub>2</sub>, CLI, and LCC.)

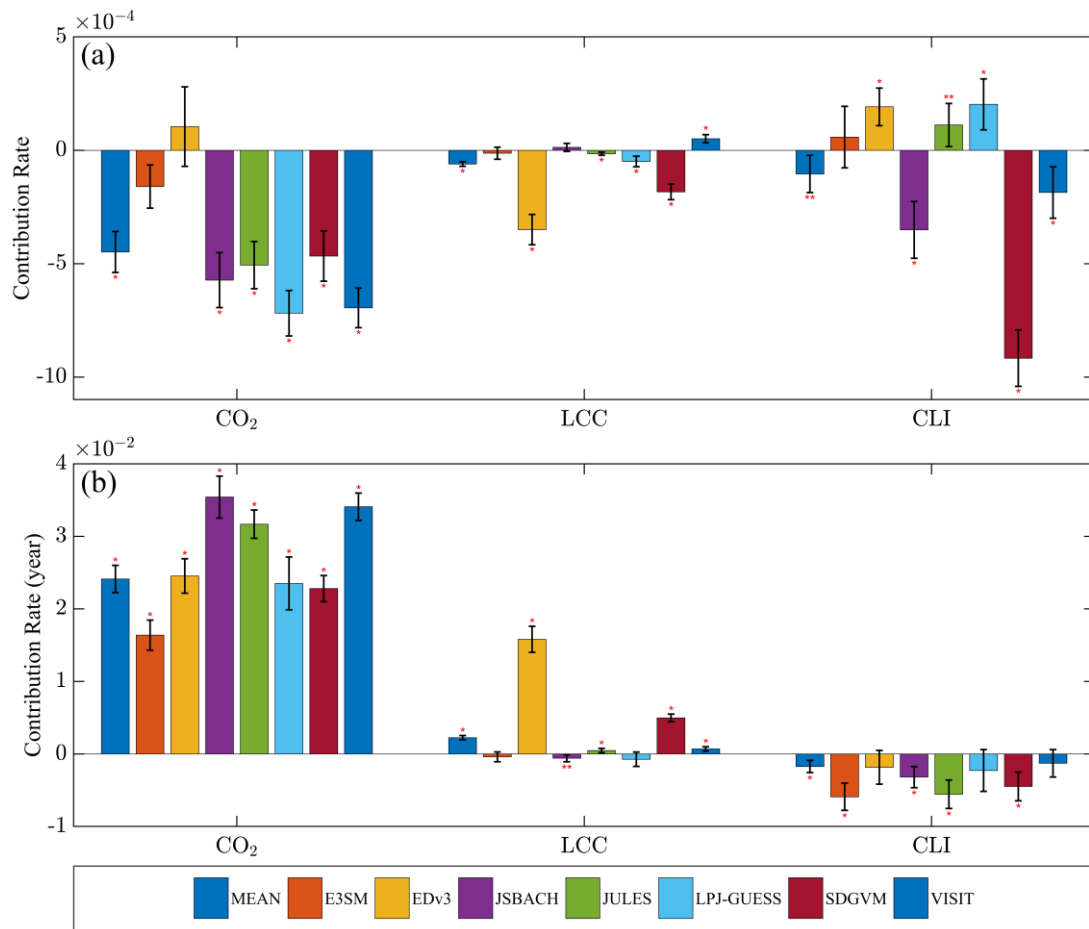

131

132 Figure S14. Variable contributions separated by TRENDY under a 16-year moving

133 window.

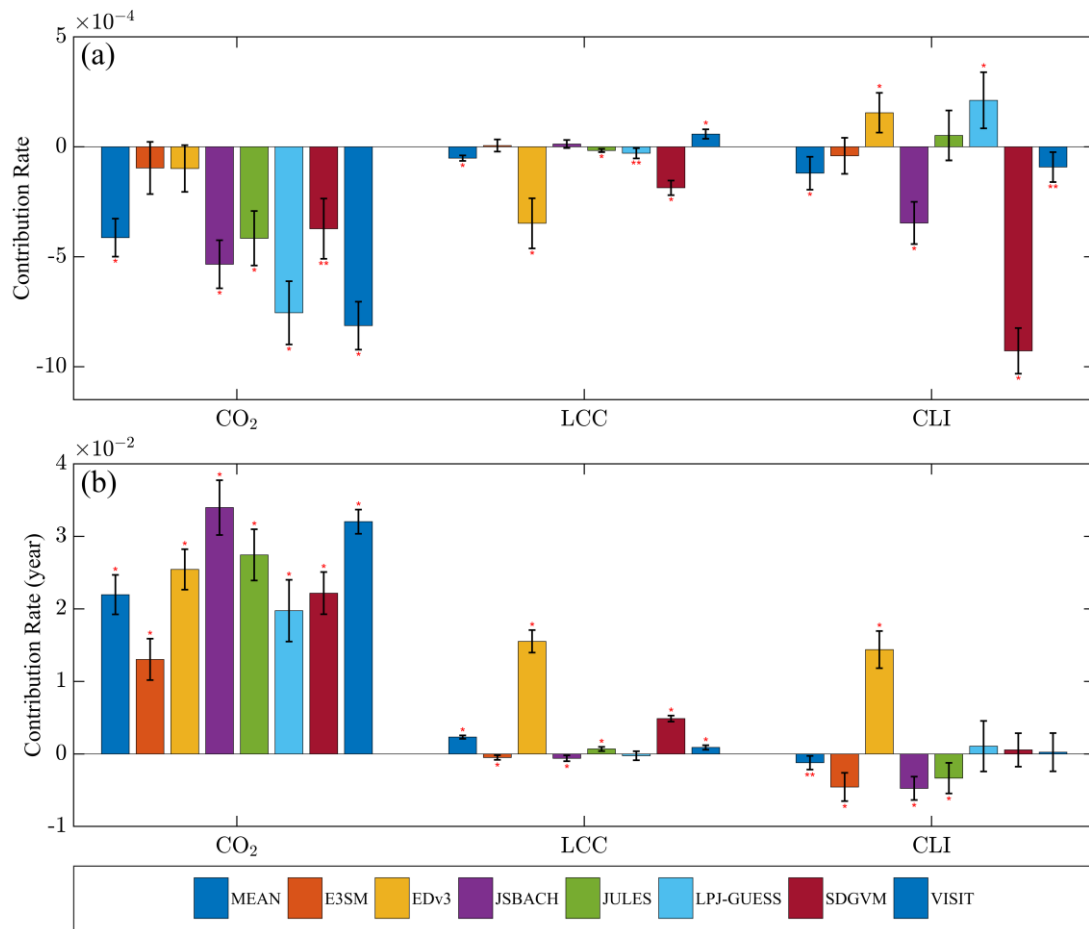

134

135 Figure S15. Variable contributions separated by TRENDY under a 20-year moving

136 window.

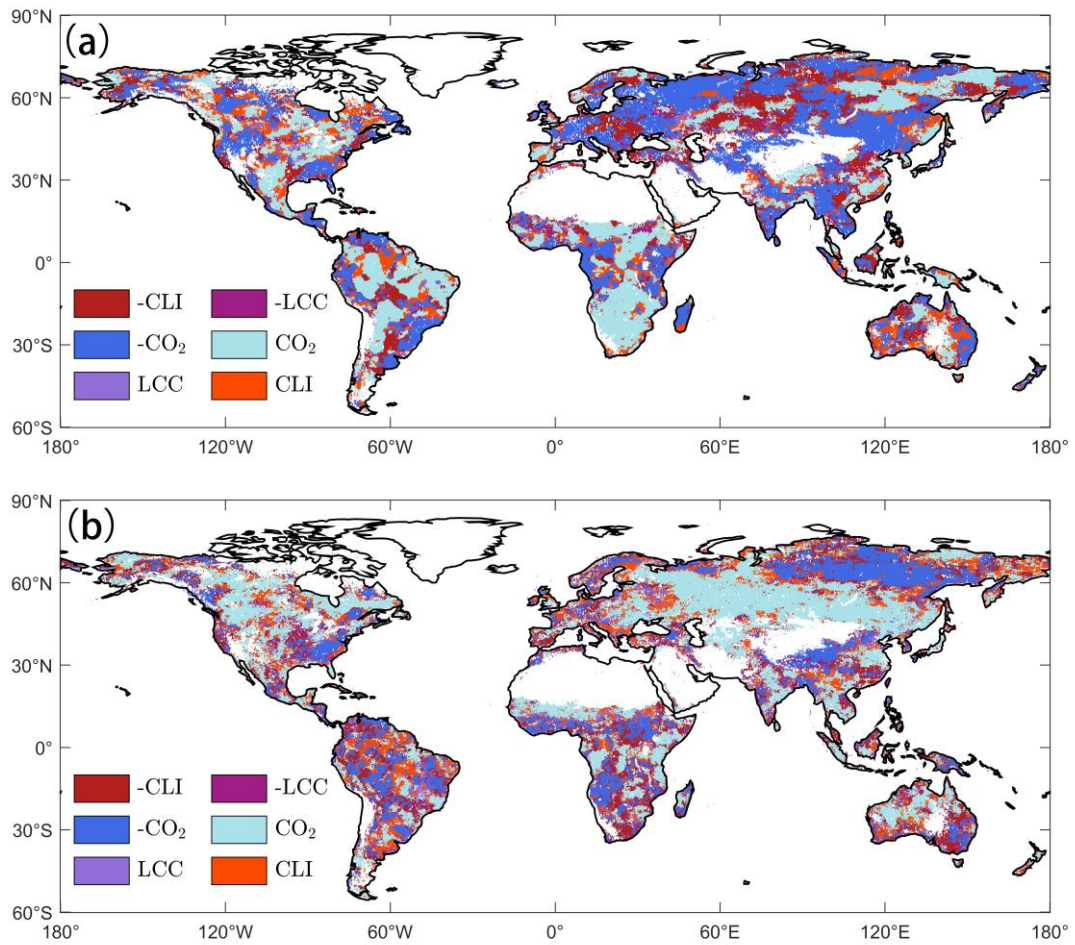

137

138 Figure S16. Spatial distribution of the dominant factors of  $CO_2$ , LCC, and CLI on (a)

139 the  $R_{max}$  and (b)  $T_{opt}$  under a 16-year moving window.

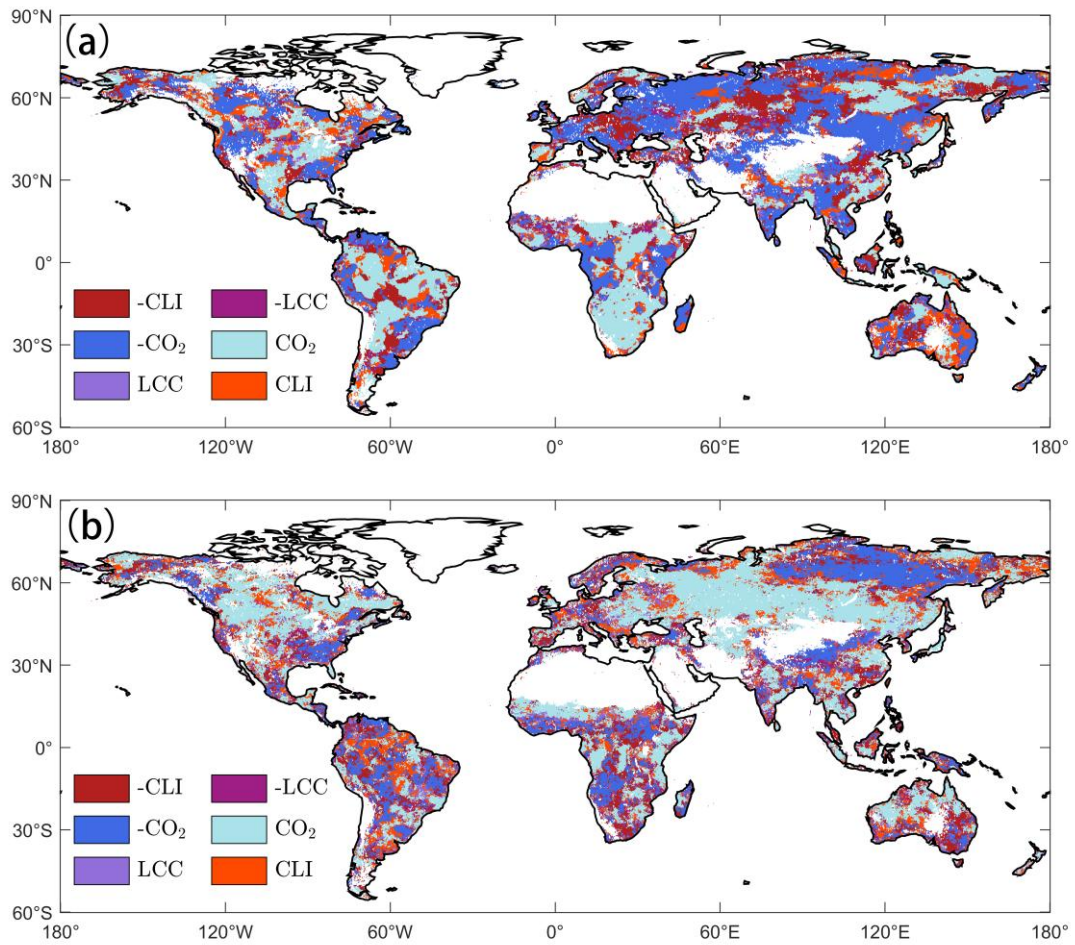

140

141 Figure S17. Spatial distribution of the dominant factors of  $CO_2$ , LCC, and CLI on (a)

142 the  $R_{max}$  and (b)  $T_{opt}$  under a 20-year moving window.

143

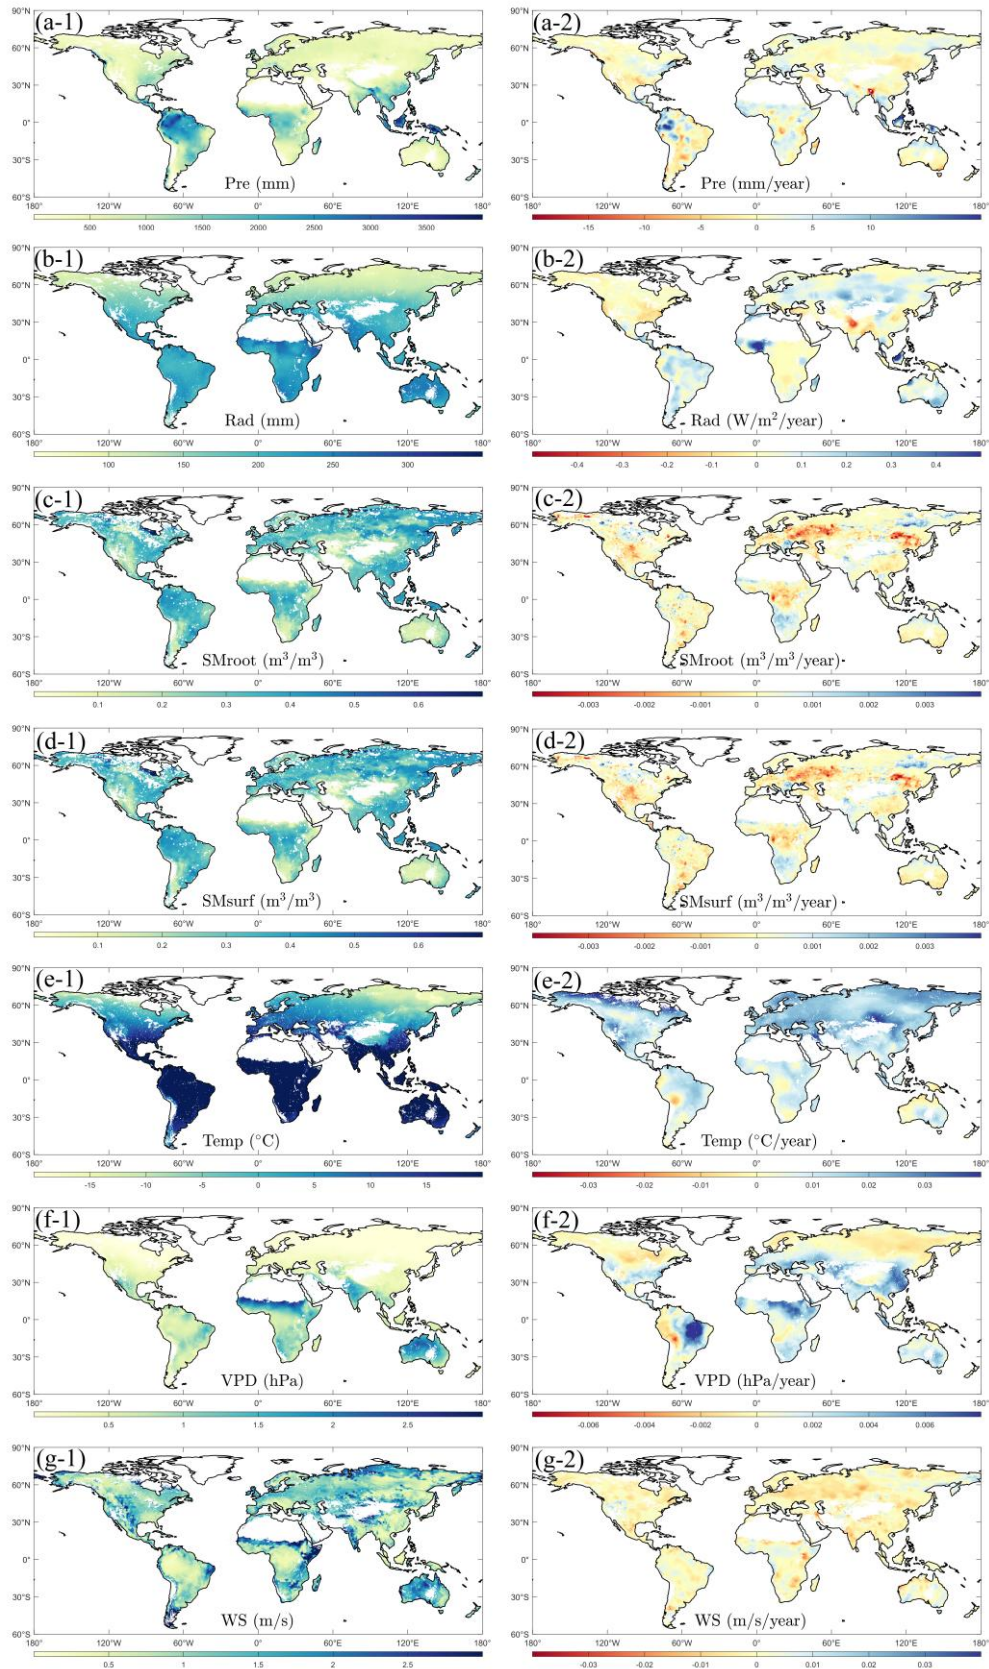

144

145 Figure S18. Spatial distribution of (1) mean and (2) change rates for (a) Pre, (b) Rad,

146 (c) SMroot, (d) SMSurf, (e) Temp, (f) VPD, and (g) WS.

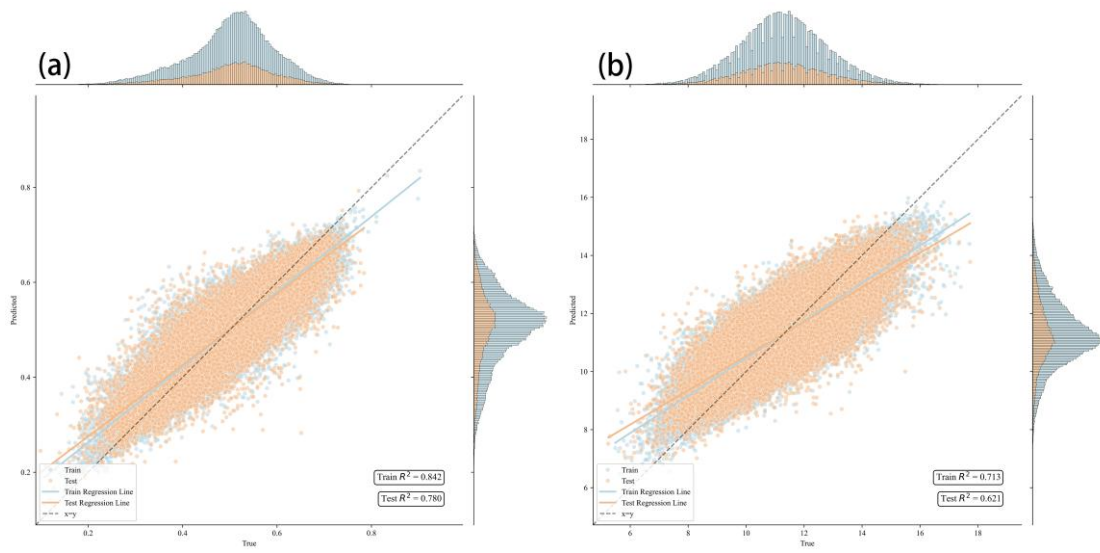

147

148 Figure S19. Model validation of (a)  $R_{max}$  and (b)  $T_{opt}$  based on XGBoost predictions.

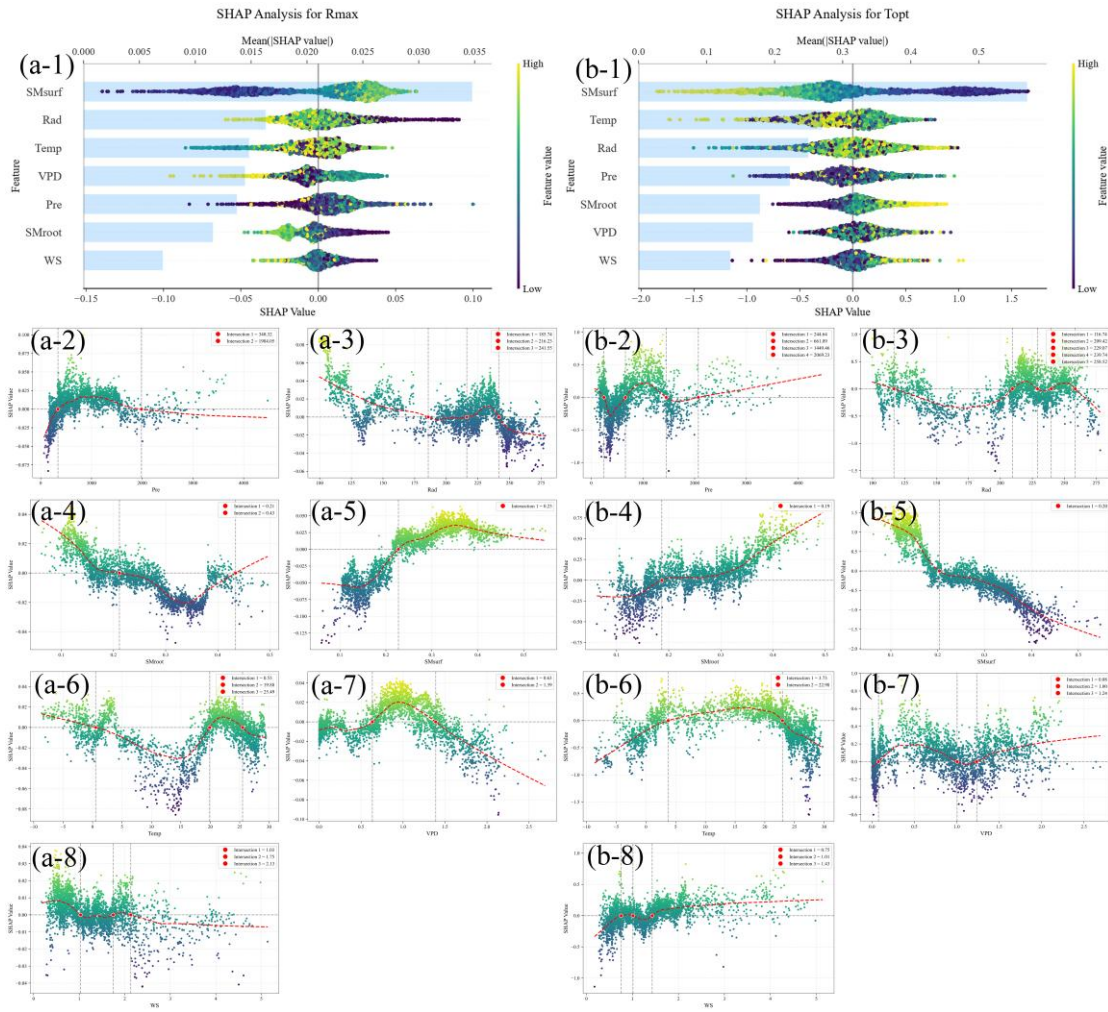

149

150 Figure S20. Global and local SHAP analyses of the effects of hydrothermal factors on  
 151 (a)  $R_{max}$  and (b)  $T_{opt}$  in Shrub. Panel 1 presents the global SHAP analysis, while panels  
 152 2–9 illustrate the local SHAP analyses for Pre, Rad, SMroot, SMSurf, Temp, VPD and  
 153 WS on  $R_{max}$  and  $T_{opt}$ , respectively.



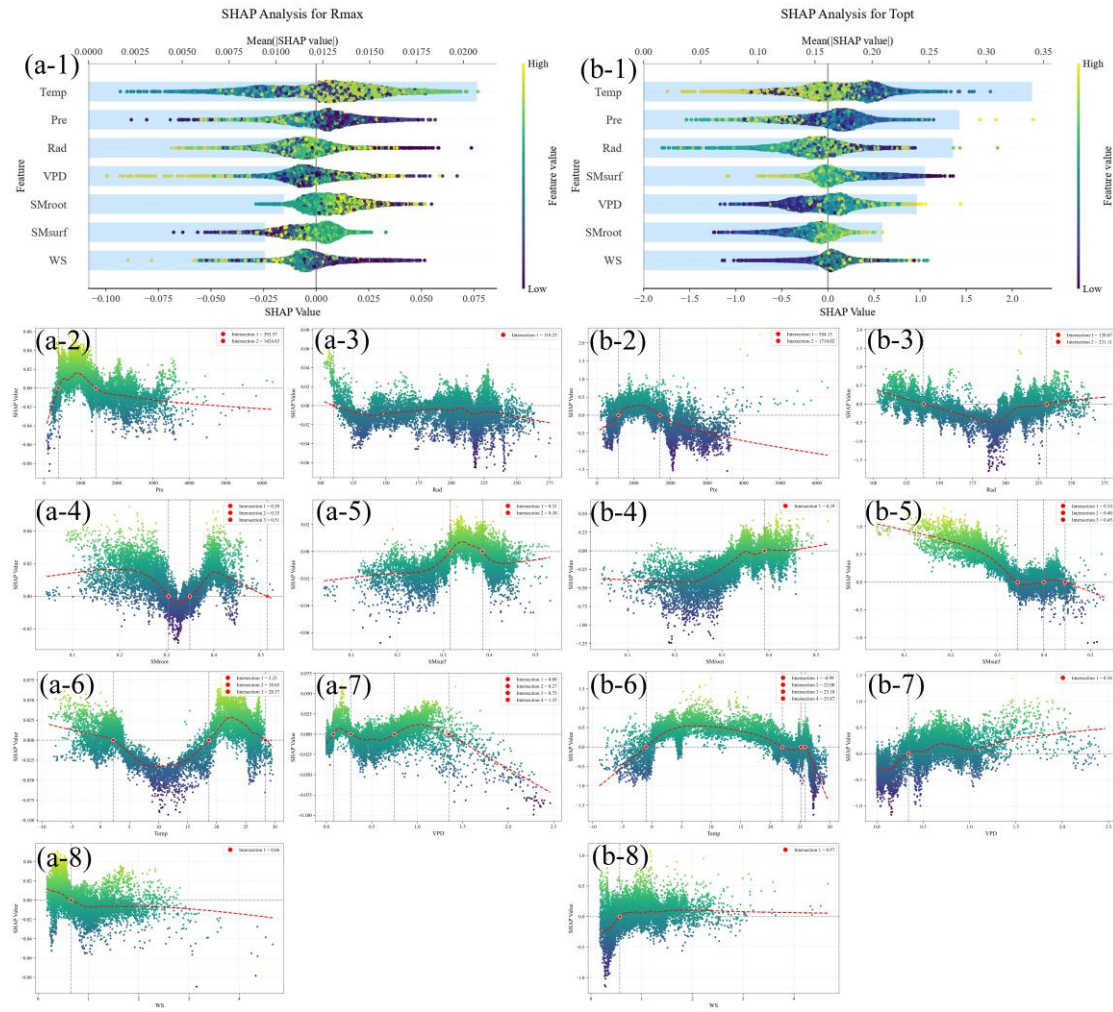

154

155 Figure S21. Global and local SHAP analyses of the effects of hydrothermal factors on  
 156 (a)  $R_{max}$  and (b)  $T_{opt}$  in Forest. Panel 1 presents the global SHAP analysis, while panels  
 157 2–9 illustrate the local SHAP analyses for Pre, Rad, SMroot, SMSurf, Temp, VPD and  
 158 WS on  $R_{max}$  and  $T_{opt}$ , respectively.

159

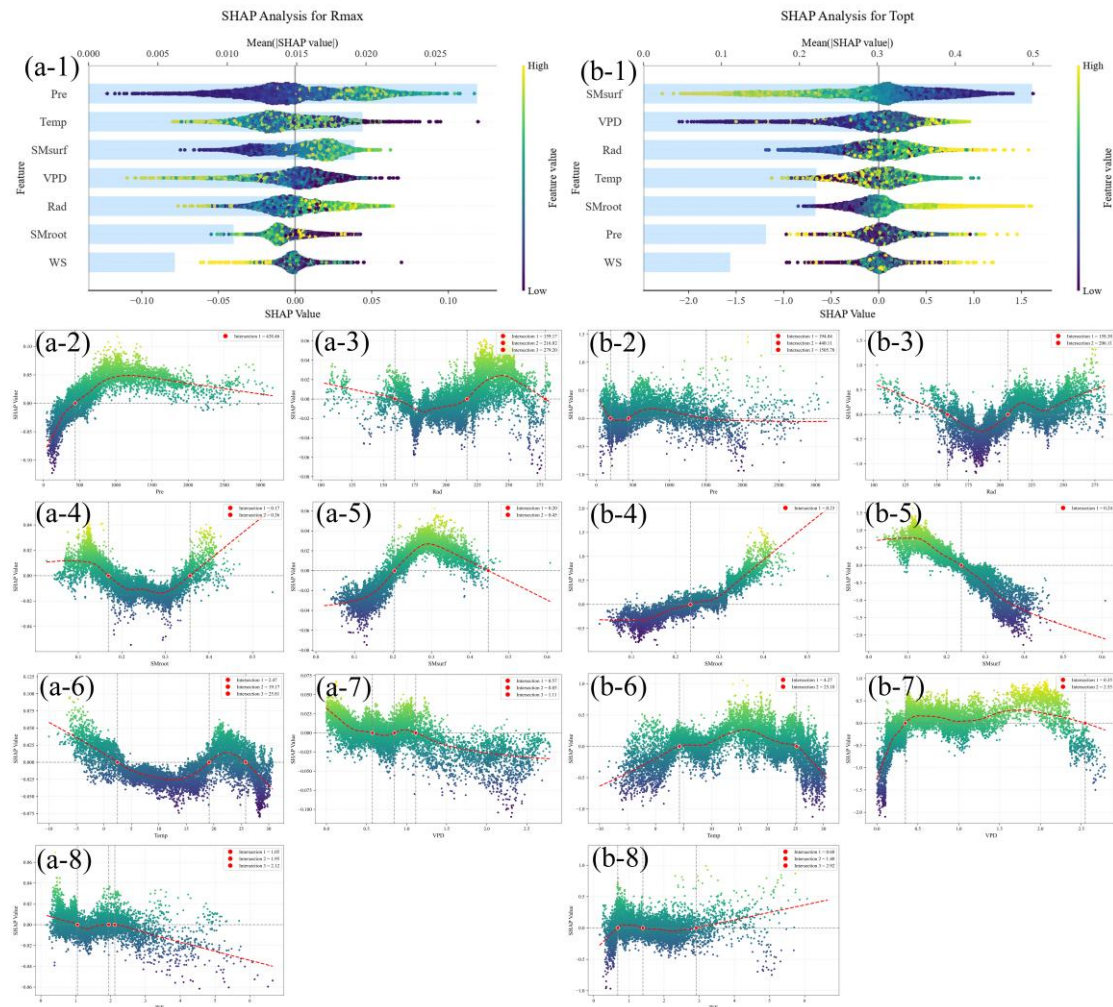

160

161 Figure S22. Global and local SHAP analyses of the effects of hydrothermal factors on

162 (a)  $R_{max}$  and (b)  $T_{opt}$  in Pasture. Panel 1 presents the global SHAP analysis, while

163 panels 2–9 illustrate the local SHAP analyses for Pre, Rad, SMroot, SMSurf, Temp,

164 VPD and WS on  $R_{max}$  and  $T_{opt}$ , respectively.

165

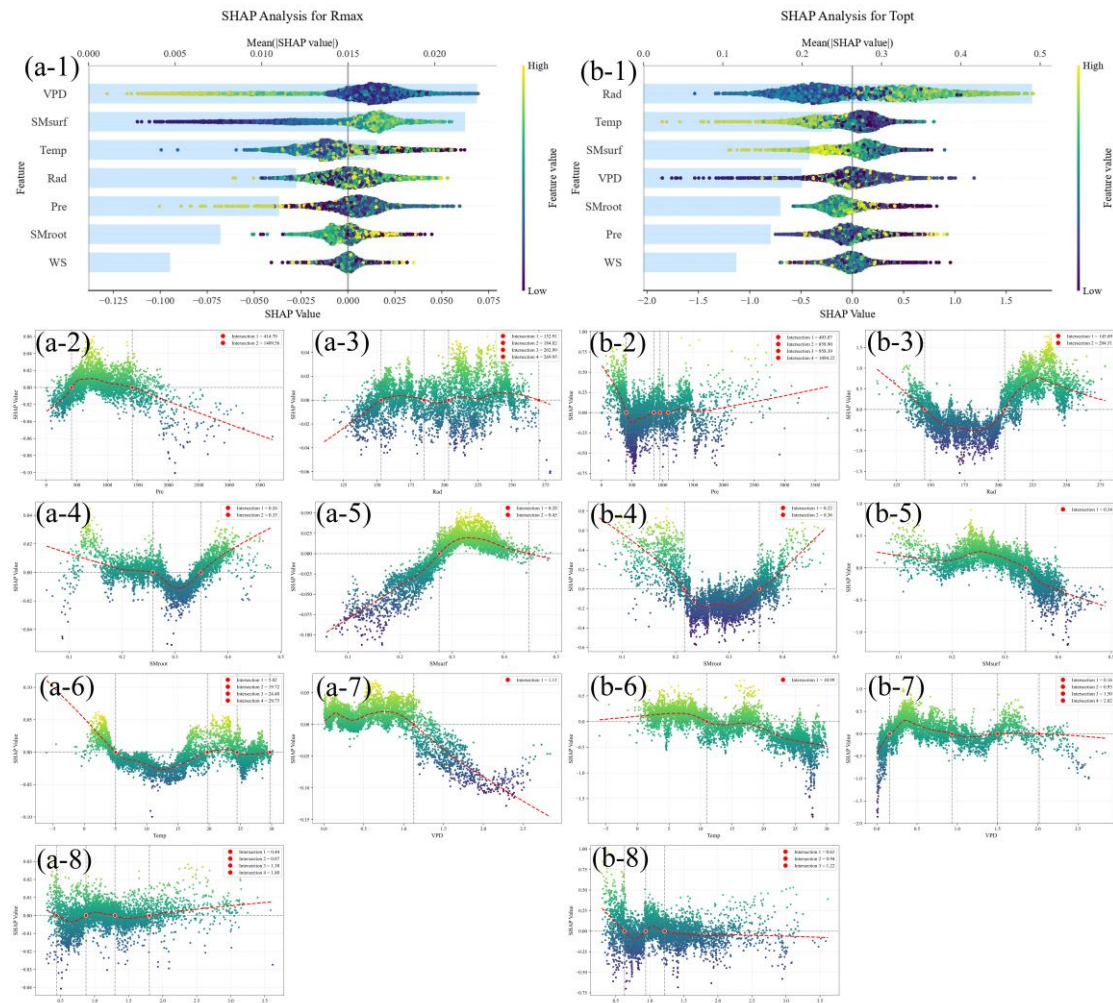

166

167 Figure S23. Global and local SHAP analyses of the effects of hydrothermal factors on  
 168 (a)  $R_{max}$  and (b)  $T_{opt}$  in Cropland. Panel 1 presents the global SHAP analysis, while  
 169 panels 2–9 illustrate the local SHAP analyses for Pre, Rad, SMroot, SMSurf, Temp,  
 170 VPD and WS on  $R_{max}$  and  $T_{opt}$ , respectively.

171

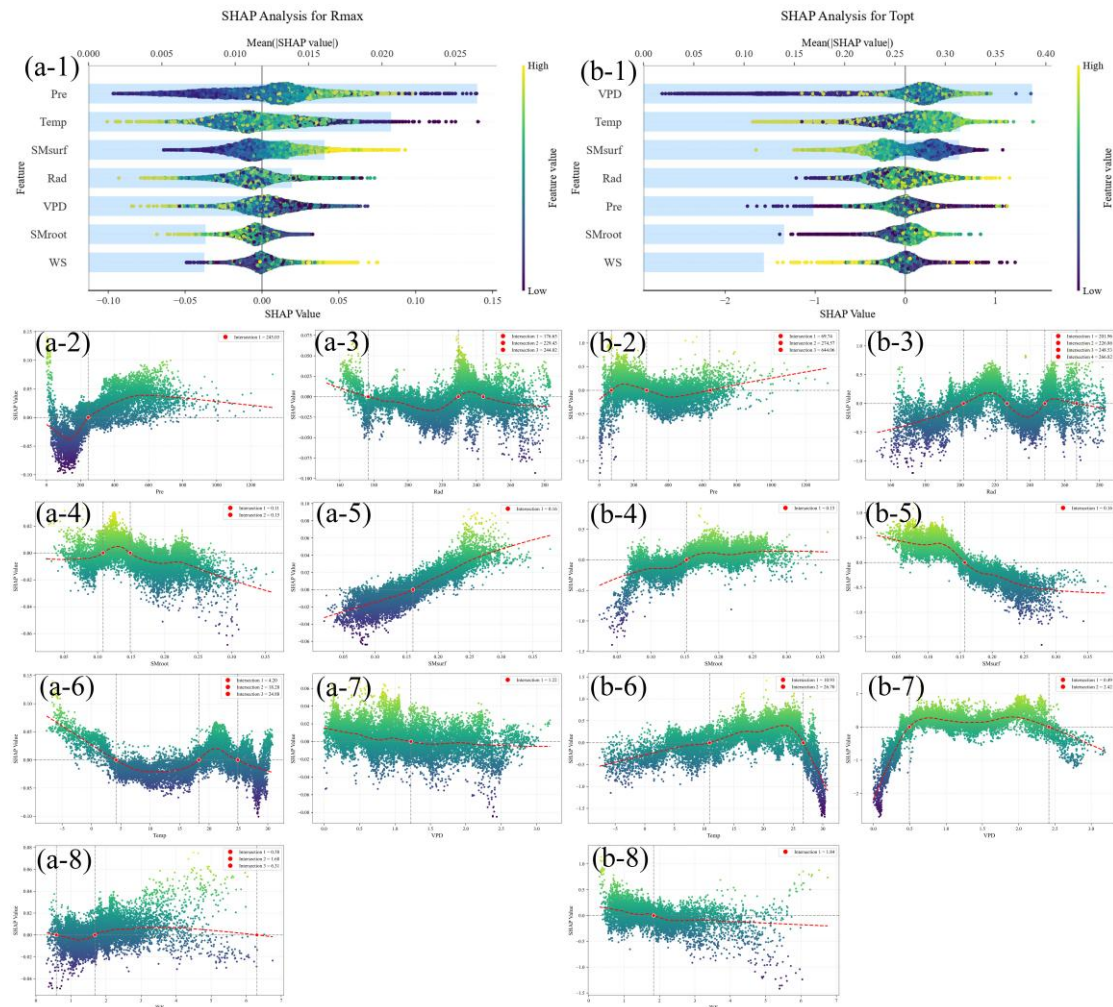

172

173 Figure S24. Global and local SHAP analyses of the effects of hydrothermal factors on  
 174 (a)  $R_{max}$  and (b)  $T_{opt}$  in AR. Panel 1 presents the global SHAP analysis, while panels  
 175 2–9 illustrate the local SHAP analyses for Pre, Rad, SMroot, SMSurf, Temp, VPD and  
 176 WS on  $R_{max}$  and  $T_{opt}$ , respectively.

177

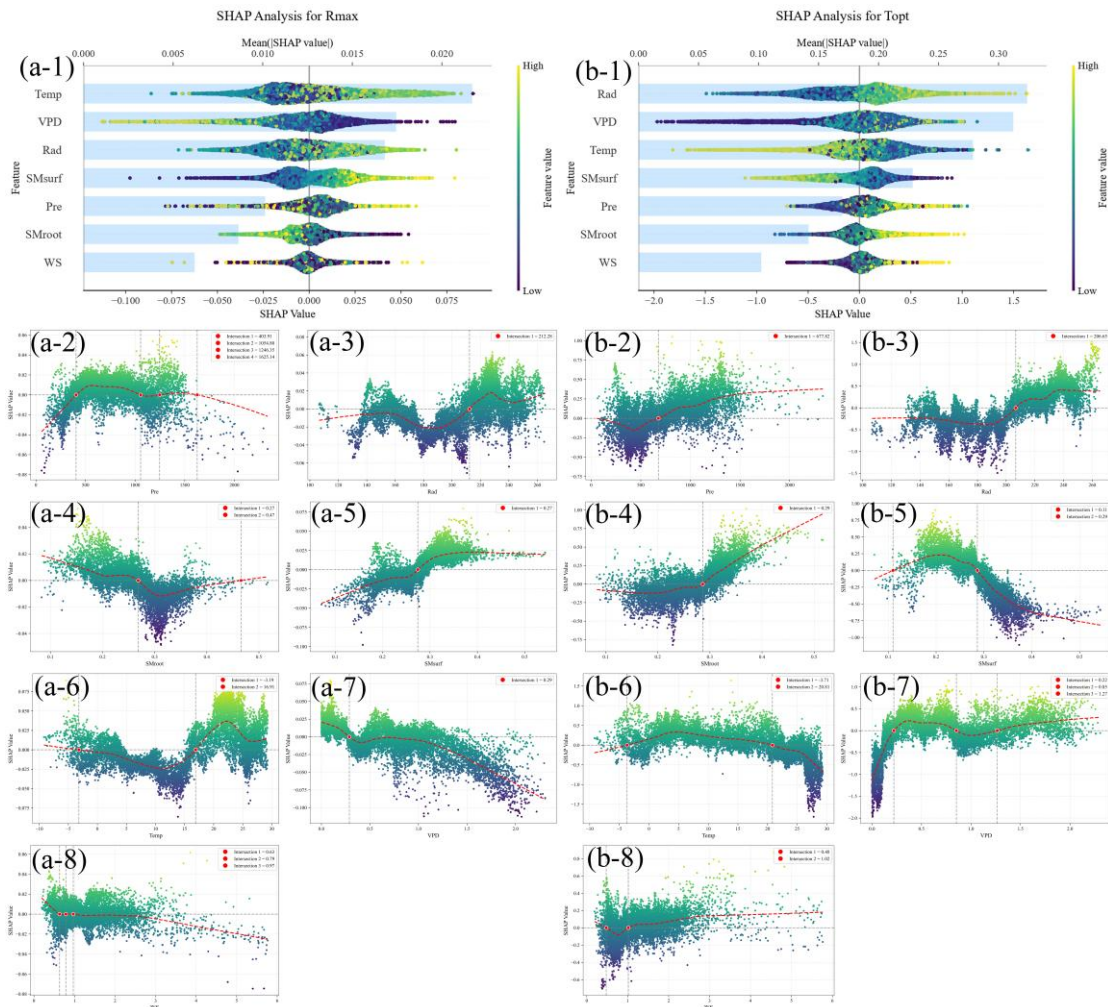

178

179 Figure S25. Global and local SHAP analyses of the effects of hydrothermal factors on  
 180 (a)  $R_{max}$  and (b)  $T_{opt}$  in SAR. Panel 1 presents the global SHAP analysis, while panels  
 181 2–9 illustrate the local SHAP analyses for Pre, Rad, SMroot, SMSurf, Temp, VPD and  
 182 WS on  $R_{max}$  and  $T_{opt}$ , respectively.

183

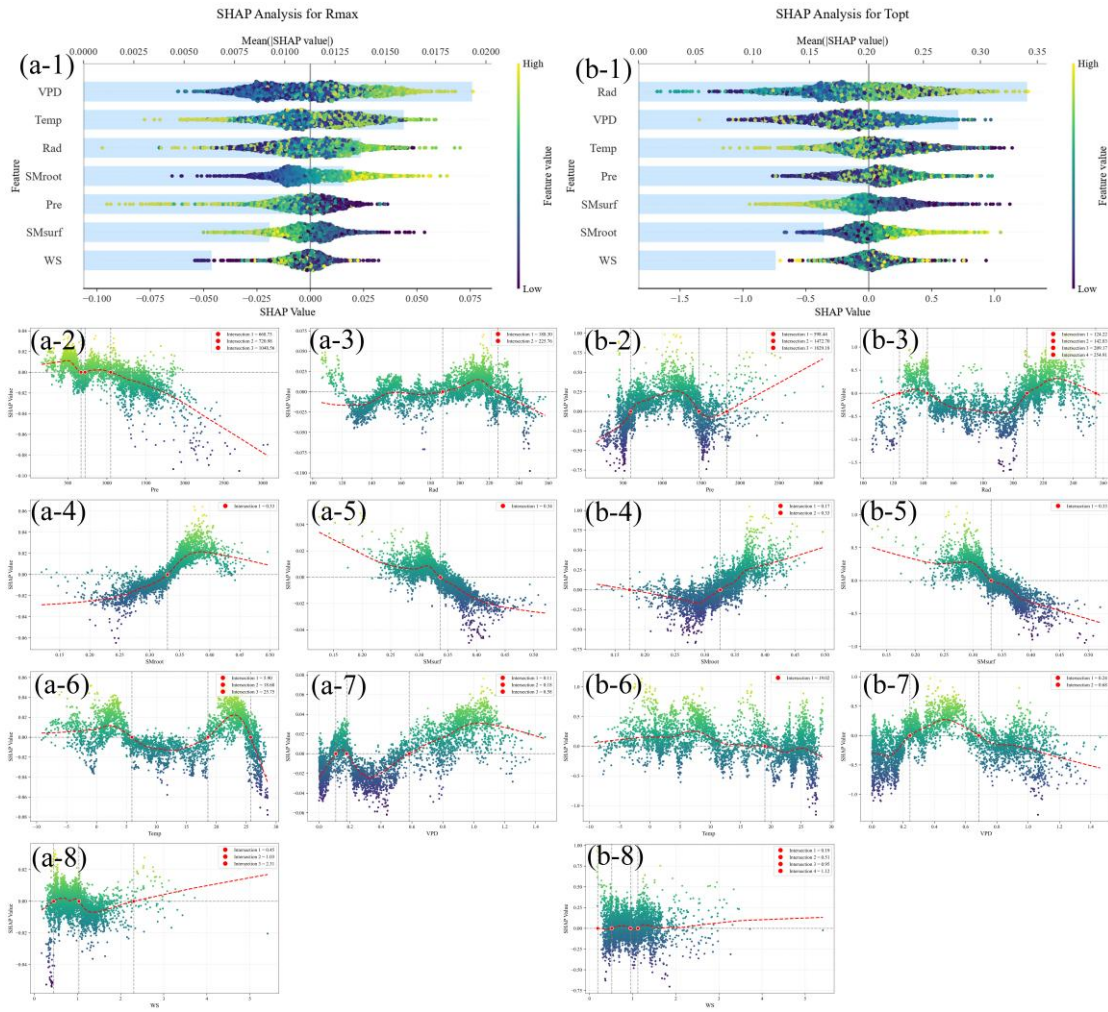

184

185 Figure S26. Global and local SHAP analyses of the effects of hydrothermal factors on  
 186 (a)  $R_{max}$  and (b)  $T_{opt}$  in SH. Panel 1 presents the global SHAP analysis, while panels  
 187 2–9 illustrate the local SHAP analyses for Pre, Rad, SMroot, SMSurf, Temp, VPD and  
 188 WS on  $R_{max}$  and  $T_{opt}$ , respectively.

189

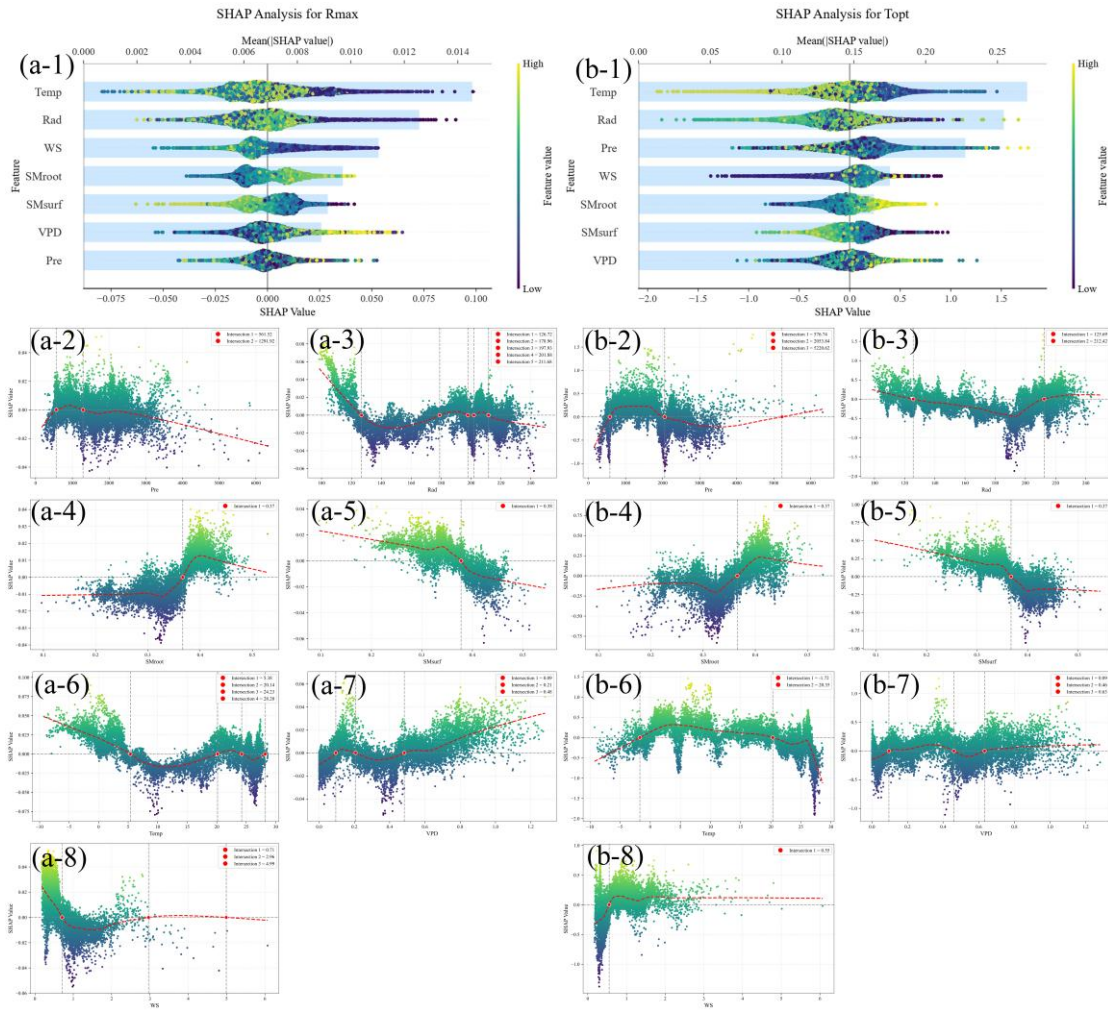

190

191 Figure S27. Global and local SHAP analyses of the effects of hydrothermal factors on  
 192 (a)  $R_{max}$  and (b)  $T_{opt}$  in HR. Panel 1 presents the global SHAP analysis, while panels  
 193 2–9 illustrate the local SHAP analyses for Pre, Rad, SMroot, SMSurf, Temp, VPD and  
 194 WS on  $R_{max}$  and  $T_{opt}$ , respectively.

195

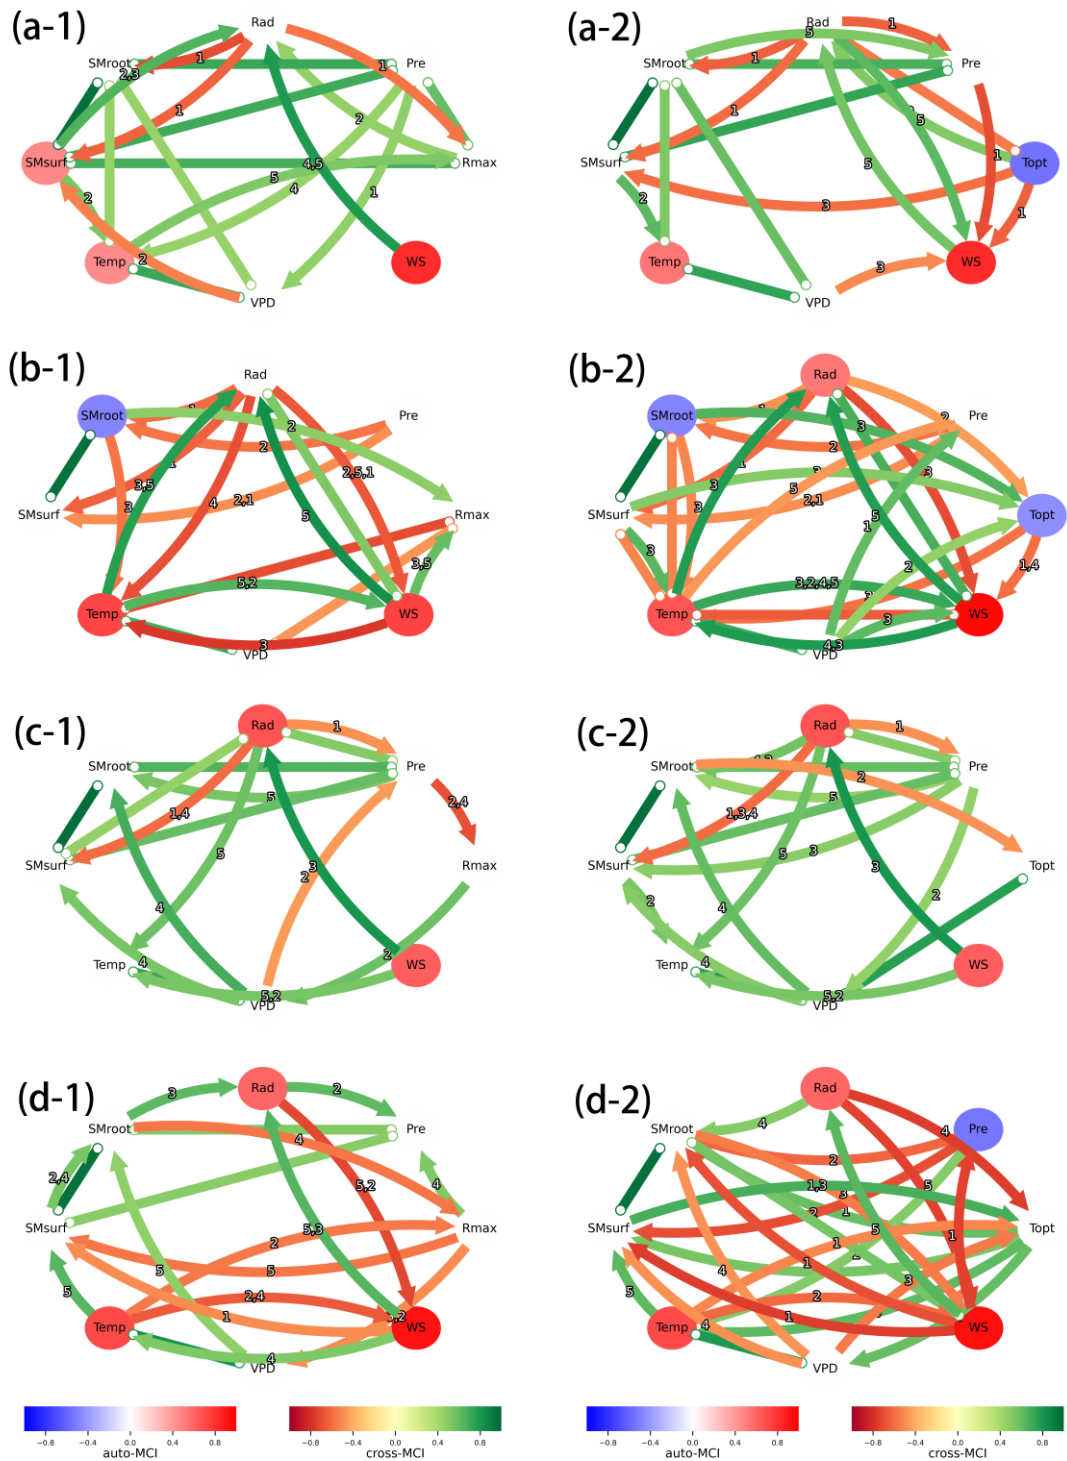

196

197 Figure S28. Causal network diagram of hydrothermal factors,  $R_{max}$ , and  $T_{opt}$  across  
 198 different vegetation types under AR.



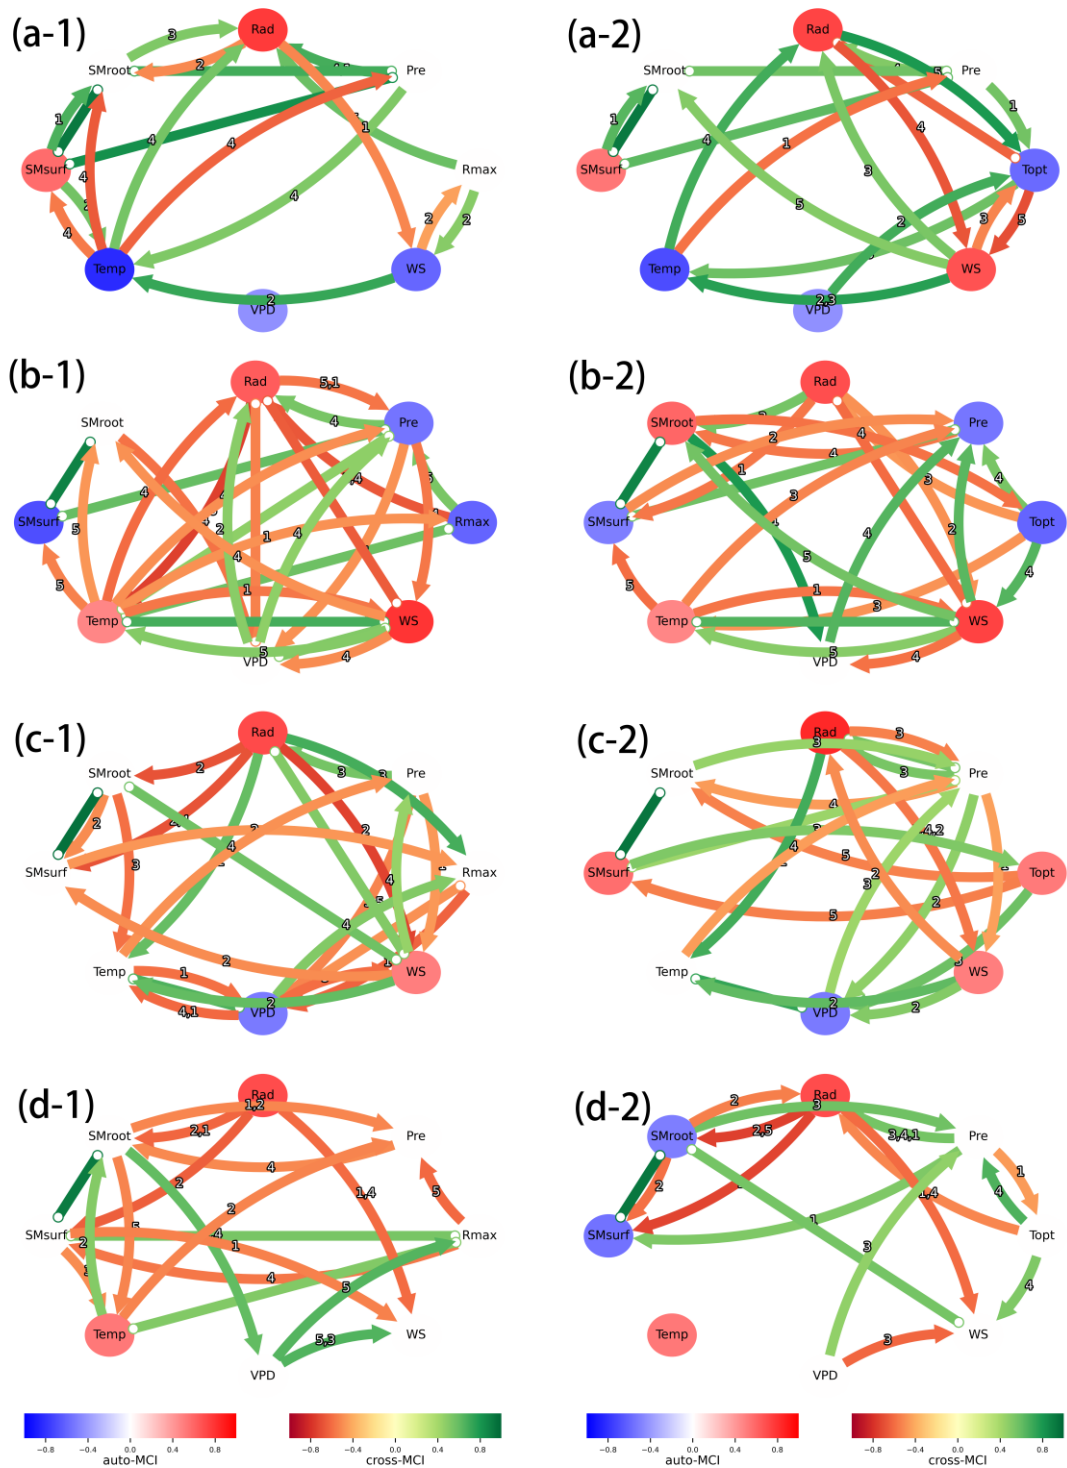

199

200 Figure S29. Causal network diagram of hydrothermal factors,  $R_{max}$ , and  $T_{opt}$  across  
 201 different vegetation types under SAR.

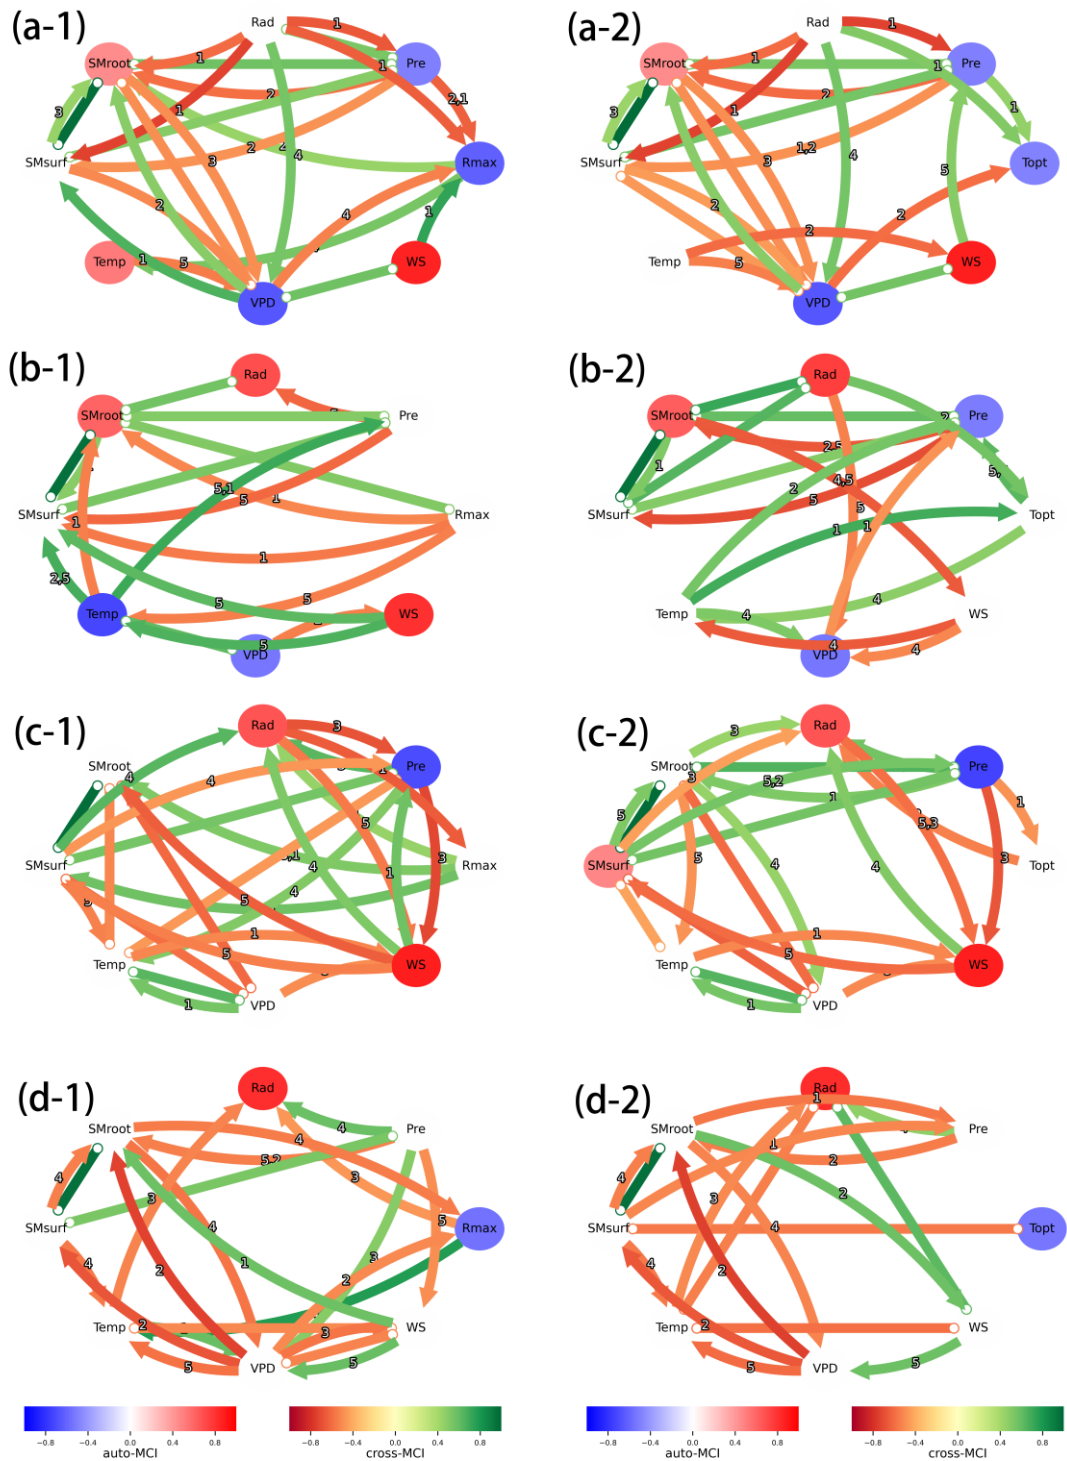

202

203 Figure S30. Causal network diagram of hydrothermal factors,  $R_{max}$ , and  $T_{opt}$  across

204 different vegetation types under SH.

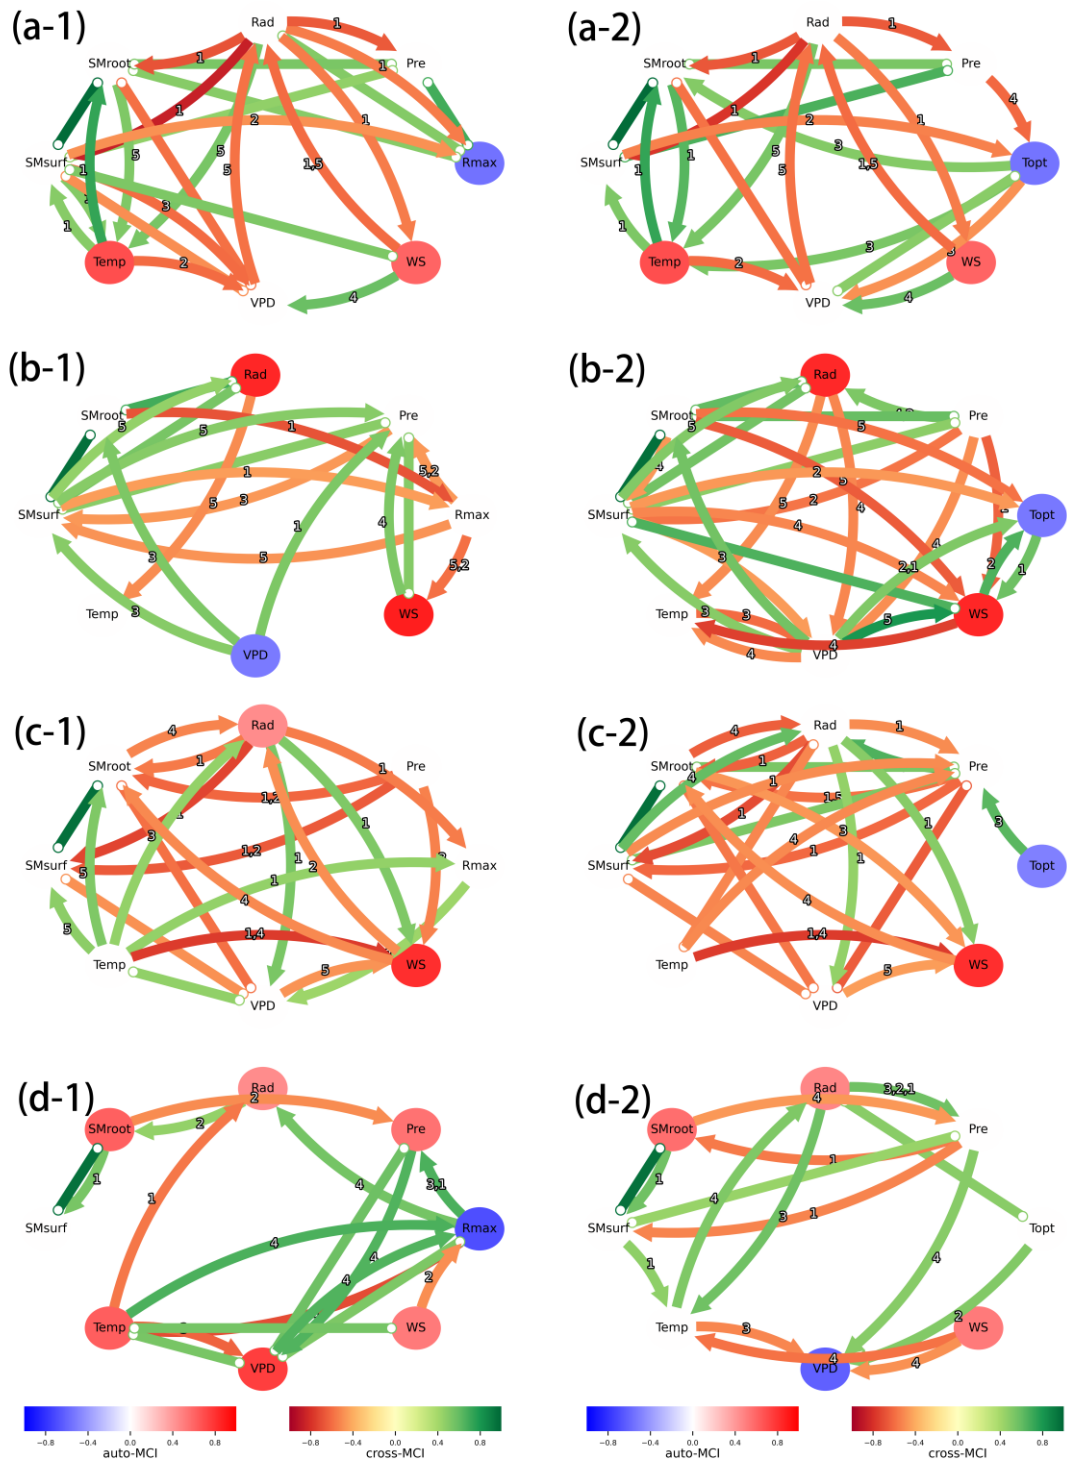

205

206 Figure S31. Causal network diagram of hydrothermal factors,  $R_{max}$ , and  $T_{opt}$  across  
 207 different vegetation types under HR.

Table S1. Basic information of the 85 selected FLUXNET 2015 sites

| SITE_ID | Lat      | Lon      | IGBP |
|---------|----------|----------|------|
| AT-Neu  | 47.1167  | 11.3175  | GRA  |
| AU-ASM  | -22.283  | 133.249  | SAV  |
| AU-Cpr  | -34.0021 | 140.5891 | SAV  |
| AU-Cum  | -33.6152 | 150.7236 | EBF  |
| AU-DaP  | -14.0633 | 131.3181 | GRA  |
| AU-DaS  | -14.1593 | 131.3881 | SAV  |
| AU-Dry  | -15.2588 | 132.3706 | SAV  |
| AU-How  | -12.4943 | 131.1523 | WSA  |
| AU-Stp  | -17.1507 | 133.3502 | GRA  |
| AU-Tum  | -35.6566 | 148.1517 | EBF  |
| AU-Wom  | -37.4222 | 144.0944 | EBF  |
| BE-Lon  | 50.5516  | 4.7462   | CRO  |
| BR-Sa1  | -2.8567  | -54.9589 | EBF  |
| CA-Gro  | 48.2167  | -82.1556 | MF   |
| CA-NS2  | 55.9058  | -98.5247 | ENF  |
| CA-NS3  | 55.9117  | -98.3822 | ENF  |
| CA-NS5  | 55.8631  | -98.485  | ENF  |
| CA-NS6  | 55.9167  | -98.9644 | OSH  |
| CA-Obs  | 53.9872  | -105.118 | ENF  |
| CA-Qfo  | 49.6925  | -74.3421 | ENF  |
| CA-SF2  | 54.2539  | -105.878 | ENF  |
| CA-SF3  | 54.0916  | -106.005 | OSH  |
| CA-TP1  | 42.6609  | -80.5595 | ENF  |
| CA-TP2  | 42.7744  | -80.4588 | ENF  |
| CA-TP3  | 42.7068  | -80.3483 | ENF  |
| CA-TP4  | 42.7102  | -80.3574 | ENF  |
| CH-Cha  | 47.2102  | 8.4104   | GRA  |
| CH-Dav  | 46.8153  | 9.8559   | ENF  |
| CH-Fru  | 47.1158  | 8.5378   | GRA  |
| CH-Lae  | 47.4783  | 8.3644   | MF   |
| CH-Oe1  | 47.2858  | 7.7319   | GRA  |
| CH-Oe2  | 47.2864  | 7.7337   | CRO  |
| CZ-BK1  | 49.5021  | 18.5369  | ENF  |
| CZ-BK2  | 49.4944  | 18.5429  | GRA  |
| CZ-wet  | 49.0247  | 14.7704  | WET  |
| DE-Akm  | 53.8662  | 13.6834  | WET  |
| DE-Geb  | 51.0997  | 10.9146  | CRO  |
| DE-Gri  | 50.95    | 13.5126  | GRA  |
| DE-Hai  | 51.0792  | 10.4522  | DBF  |
| DE-Kli  | 50.8931  | 13.5224  | CRO  |
| DE-Lkb  | 49.0996  | 13.3047  | ENF  |
| DE-Lnf  | 51.3282  | 10.3678  | DBF  |
| DE-Obe  | 50.7867  | 13.7213  | ENF  |

---

|        |         |          |     |
|--------|---------|----------|-----|
| DE-Spw | 51.8922 | 14.0337  | WET |
| ES-Amo | 36.8336 | -2.2523  | OSH |
| ES-LJu | 36.9266 | -2.7521  | OSH |
| FR-Fon | 48.4764 | 2.7801   | DBF |
| FR-Gri | 48.8442 | 1.9519   | CRO |
| FR-LBr | 44.7171 | -0.7693  | ENF |
| GF-Guy | 5.2788  | -52.9249 | EBF |
| IT-BCi | 40.5237 | 14.9574  | CRO |
| IT-Cpz | 41.7052 | 12.3761  | EBF |
| IT-Lav | 45.9562 | 11.2813  | ENF |
| IT-MBo | 46.0147 | 11.0458  | GRA |
| IT-Noe | 40.6062 | 8.1517   | CSH |
| IT-Ro1 | 42.4081 | 11.93    | DBF |
| IT-Ro2 | 42.3903 | 11.9209  | DBF |
| IT-Tor | 45.8444 | 7.5781   | GRA |
| JP-SMF | 35.2617 | 137.0788 | MF  |
| MY-PSO | 2.973   | 102.3062 | EBF |
| NL-Hor | 52.2403 | 5.0713   | GRA |
| US-ARM | 36.6058 | -97.4888 | CRO |
| US-Blo | 38.8953 | -120.633 | ENF |
| US-Cop | 38.09   | -109.39  | GRA |
| US-GLE | 41.3665 | -106.24  | ENF |
| US-Goo | 34.2547 | -89.8735 | GRA |
| US-IB2 | 41.8406 | -88.241  | GRA |
| US-Los | 46.0827 | -89.9792 | WET |
| US-Me2 | 44.4526 | -121.559 | ENF |
| US-Me3 | 44.3154 | -121.608 | ENF |
| US-Me6 | 44.3233 | -121.608 | ENF |
| US-Ne1 | 41.1651 | -96.4766 | CRO |
| US-Ne2 | 41.1649 | -96.4701 | CRO |
| US-Ne3 | 41.1797 | -96.4397 | CRO |
| US-Oho | 41.5545 | -83.8438 | DBF |
| US-SRC | 31.9083 | -110.84  | OSH |
| US-SRG | 31.7894 | -110.828 | GRA |
| US-Sta | 41.3966 | -106.802 | OSH |
| US-Syv | 46.242  | -89.3477 | MF  |
| US-Twt | 38.1087 | -121.653 | CRO |
| US-UMB | 45.5598 | -84.7138 | DBF |
| US-UMd | 45.5625 | -84.6975 | DBF |
| US-WCr | 45.8059 | -90.0799 | DBF |
| US-Whs | 31.7438 | -110.052 | OSH |
| US-Wkg | 31.7365 | -109.942 | GRA |

---
